1 **The transcriptional corepressor CTBP-1 acts with the SOX family**  
2 **transcription factor EGL-13 to maintain AIA interneuron cell identity in *C.***  
3 ***elegans***

4

5 Josh Saul<sup>1</sup>, Takashi Hirose<sup>1,#a</sup>, H. Robert Horvitz<sup>1,\*</sup>

6

7 **Affiliations**

8 <sup>1</sup> Howard Hughes Medical Institute, Department of Biology, Massachusetts

9 Institute of Technology, Cambridge, MA, USA

10

11 <sup>#a</sup> Current Address: Sysmex Corporation, 4-4-4 Takatsukadai, Nishi-ku,

12 Kobe 651-2271, Japan

13

14 \*Corresponding author

15 email: [horvitz@mit.edu](mailto:horvitz@mit.edu) (HRH)

16

17 Draft: 07/27/2021

## 18 **Abstract**

19 Cell identity is characterized by a distinct combination of gene expression, cell  
20 morphology and cellular function established as progenitor cells divide and  
21 differentiate. Following establishment, cell identities can be unstable and require  
22 active and continuous maintenance throughout the remaining life of a cell.  
23 Mechanisms underlying the maintenance of cell identities are incompletely  
24 understood. Here we show that the gene *ctbp-1*, which encodes the  
25 transcriptional corepressor C-terminal binding protein-1 (CTBP-1), is essential for  
26 the maintenance of the identities of the two AIA interneurons in the nematode  
27 *Caenorhabditis elegans*. *ctbp-1* is not required for the establishment of the AIA  
28 cell fate but rather functions cell-autonomously and can act in older worms to  
29 maintain proper AIA gene expression, morphology and function. From a screen  
30 for suppressors of the *ctbp-1* mutant phenotype, we identified the gene *egl-13*,  
31 which encodes a SOX family transcription factor. We found that *egl-13* regulates  
32 AIA function and aspects of AIA gene expression, but not AIA morphology. We  
33 conclude that the CTBP-1 protein maintains AIA cell identity in part by utilizing  
34 EGL-13 to repress transcriptional activity in the AIAs. More generally, we  
35 propose that transcriptional corepressors like CTBP-1 might be critical factors in  
36 the maintenance of cell identities, harnessing the DNA-binding specificity of  
37 transcription factors like EGL-13 to selectively regulate gene expression in a cell-  
38 specific manner.

## 39 Introduction

40 Over the course of animal development, complex networks of transcription  
41 factors act and interact to drive the division and differentiation of progenitor cells  
42 towards terminal cell identities [1–8]. These networks of transcriptional activity  
43 often culminate in the activation of master transcriptional regulators that are  
44 responsible for directing the differentiation of a diverse range of cell and tissue  
45 types [4,9–12]. Examples of such master transcriptional regulators include the  
46 mammalian bHLH transcription factor MyoD, which specifies skeletal muscle  
47 cells [13–15]; the *Drosophila* Pax-family transcription factor Eyeless, which drives  
48 differentiation of the fly eye [16–20]; and the *C. elegans* GATA transcription  
49 factor ELT-2, essential for development of the worm intestine [21–24]. Many such  
50 master transcriptional regulators are not only required to establish the identities  
51 of specific cell types but are subsequently continuously required to maintain  
52 those identities for the remaining life of the cell [4,23,25–29]. Defects in the  
53 maintenance of cell identities can manifest as late-onset misregulated gene  
54 expression, altered morphology or disrupted cellular function, and often become  
55 progressively worse as the cell ages [25,28,30–32].

56 Previous studies of the nematode *Caenorhabditis elegans* have identified  
57 a class of master transcriptional regulators, termed terminal selectors [4,12,33–  
58 37]. Terminal selectors drive the expression of whole batteries of gene activity  
59 that ultimately define the unique features of many different cell types [10–12].  
60 Individual terminal selectors have been shown to contribute to the establishment  
61 and maintenance of multiple distinct *C. elegans* cell types and to drive the

62 expression of many cell-type specific genes [7,37–41]. However, it has been  
63 unclear how individual terminal selectors can drive the expression of cell-type  
64 specific genes in only the appropriate cell types rather than in all cells in which  
65 they act [42–44]. Recent work has shown that terminal selectors appear to  
66 broadly activate the expression of many genes, including cell-type specific  
67 genes, in all cells in which they function [42,45]. Piecemeal assemblies of  
68 transcription factors are then responsible for pruning this broad expression to  
69 restrict expression of cell-type specific genes to the appropriate cell types  
70 [42,45]. This restriction of the activation of gene expression by terminal selectors  
71 appears to be an essential aspect of proper cell-identity maintenance  
72 [28,42,45,46]. However, it is not known how the myriad of transcription factors  
73 utilized to restrict terminal selector gene activation are coordinated and  
74 controlled.

75 Here we report the discovery that the *C. elegans* gene *ctbp-1*, which  
76 encodes the sole worm ortholog of the C-terminal Binding Protein (CtBP) family  
77 of transcriptional corepressors [47–55], functions to maintain the cell identity of  
78 the two AIA interneurons. We demonstrate that CTBP-1 functions with the SOX-  
79 family transcription factor EGL-13 [56,57] to maintain multiple aspects of the AIA  
80 cell identity and propose that CTBP-1 does so in part by utilizing EGL-13 to  
81 repress transcriptional activity in the AIAs.

## 82 **Results**

### 83 **Mutations in *ctbp-1* cause *ceh-28* reporter misexpression in the AIA**

#### 84 **neurons**

85 In previous studies, we screened for and characterized mutations that  
86 prevent the programmed cell death of the sister cell of the *C. elegans* M4 neuron  
87 [58,59]. For these screens, we used the normally M4-specific GFP transcriptional  
88 reporter *P<sub>ceh-28</sub>::gfp* and identified isolates with an undead M4 sister cell, which  
89 expresses characteristics normally expressed by the M4 cell, on the basis of  
90 ectopic GFP expression. In addition to mutants with an undead M4 sister cell, we  
91 isolated 18 mutant strains that express *P<sub>ceh-28</sub>::gfp* in a manner uncharacteristic  
92 of M4 or its undead sister. These mutants express *P<sub>ceh-28</sub>::gfp* in a bilaterally  
93 symmetric pair of cells located near the posterior of the *C. elegans* head, far from  
94 both M4 and the single M4 sister cell (Fig. 1A).

95 These mutations define a single complementation group and all 18 mutant  
96 strains have mutations in the transcriptional corepressor gene *ctbp-1* (Figs. 1C;  
97 S1A-B; S2A). These *ctbp-1* alleles include three splice-site mutations and nine  
98 nonsense mutations (such as the mutation *n4784*, an early nonsense mutation  
99 and one of many presumptive null alleles of the gene). The mutant phenotype is  
100 recessive, and a transgenic construct carrying a wild-type copy of *ctbp-1*  
101 expressed under its native promoter fully rescued the GFP misexpression  
102 caused by *n4784* (Figs. 1A; S2A). *tm5512*, a 632 bp deletion spanning the  
103 transcription start site and first two exons of the *ctbp-1a* isoform and a  
104 presumptive null allele of this gene [60], likewise caused *P<sub>ceh-28</sub>::gfp*

105 misexpression in two cells in the posterior region of the head (Fig. S1C-D),  
106 similar to our *ctbp-1* isolates. These findings demonstrate that loss of *ctbp-1*  
107 function is responsible for  $P_{ceh-28}::gfp$  misexpression.

108 To determine the identity of the cells misexpressing the normally M4-  
109 specific marker  $P_{ceh-28}::gfp$ , we examined reporters for cells in the vicinity of the  
110 observed misexpression in *ctbp-1* mutants. The AIA-neuron reporter  $nls843[P_{gcy-}$   
111  $28.d::mCherry]$  showed complete overlap with misexpressed  $P_{ceh-28}::gfp$ , indicating  
112 that the cells misexpressing the M4 reporter are the two bilaterally symmetric and  
113 embryonically-generated AIA interneurons (Fig. 1B).

114

### 115 **The penetrance of *ceh-28* reporter misexpression in the AIA neurons**

#### 116 **increases with age**

117 While characterizing *ctbp-1* mutants, we noticed that fewer young worms  
118 misexpress  $P_{ceh-28}::gfp$  in the AIAs than do older worms (Fig. 1D). To investigate  
119 the temporal aspect of this phenotype, we scored *ctbp-1* mutants for  $P_{ceh-28}::gfp$   
120 misexpression throughout the four worm larval stages (L1-L4) and into the first  
121 day of adulthood (“early” and “day 1” adults). *ctbp-1* mutants rarely misexpressed  
122  $P_{ceh-28}::gfp$  at early larval stages, but displayed an increasing penetrance, though  
123 invariant expressivity, of this defect as worms transitioned through larval  
124 development, such that by the last larval stage (L4) nearly all worms exhibited  
125 reporter misexpression specifically and solely in the AIAs (Fig. 1E). A similar  
126 stage-dependent increase in reporter expression in *ctbp-1* mutants occurred in  
127 mutants carrying a second independently-generated *ceh-28* reporter,  $nls348[P_{ceh-}$

128 *28::mCherry*] (Fig. S1E). These results demonstrate that *ctbp-1* function prevents  
129 an age-dependent misexpression of the M4-specific gene *ceh-28* in the unrelated  
130 AIA neurons.

131 We next asked in what cells and at what stages *ctbp-1* functions to  
132 suppress *P<sub>ceh-28::gfp</sub>* expression in the AIAs. We generated a transgenic  
133 construct that expresses wild-type *ctbp-1* specifically in the AIAs, *nls743[P<sub>gcy-28.d::ctbp-1(+)</sub>]*  
134 (hereafter referred to as *nls743[P<sub>AIA::ctbp-1(+)</sub>]*). We found that  
135 AIA-specific restoration of *ctbp-1* was sufficient to suppress *P<sub>ceh-28::gfp</sub>*  
136 misexpression in an otherwise *ctbp-1* mutant background (Figs. 1F; S2A),  
137 demonstrating that *ctbp-1* is able to act cell-autonomously to regulate *ceh-28*  
138 expression in the AIA neurons.

139 To determine if *ctbp-1* can act in older animals to suppress AIA gene  
140 misexpression, we generated a transgenic construct that drives expression of  
141 wild-type *ctbp-1* throughout the worm in response to a short heat shock,  
142 *nEx2351[P<sub>hsp-16.2::ctbp-1(+)</sub>;P<sub>hsp-16.41::ctbp-1(+)</sub>]* (hereafter referred to as  
143 *nEx2351[P<sub>hsp::ctbp-1(+)</sub>]*). We found that heat shock during the L4 larval stage  
144 was sufficient to suppress *P<sub>ceh-28::gfp</sub>* misexpression in adult *ctbp-1* mutant AIAs  
145 (Figs. 1G-H; S2B), demonstrating that *ctbp-1* can act in older worms to regulate  
146 AIA gene expression.

147 From these data we conclude that *ctbp-1* is able to act cell-autonomously  
148 and in older worms to prevent expression of at least one non-AIA gene in the AIA  
149 neurons.

150

151 ***ctbp-1* mutant AIAs are not transdifferentiating into an M4-like cell identity**

152 We asked if  $P_{ceh-28}::gfp$  misexpression in the AIAs of *ctbp-1* mutants might  
153 be a consequence of the AIAs transdifferentiating into an M4-like cell identity. We  
154 scored *ctbp-1* mutants for cell-type markers expressed in, although not  
155 necessarily unique to, either M4 or the AIA neurons (Figs. 2A-B; S3A-B). We  
156 found that *ctbp-1* mutant AIAs expressed all five of five AIA markers tested and  
157 did not express any of four other (non-*ceh-28*) M4 markers tested. Of particular  
158 note, *ctbp-1* mutant AIAs did not misexpress either of the two tested M4 genes  
159 known to be directly regulated by *ceh-28* (i.e. *dbl-1* and *egl-17*), indicating that  
160 the *ceh-28* misexpression in mutant AIAs does not activate the *ceh-28* regulatory  
161 pathway [61,62]. We conclude that *ctbp-1* mutant AIAs are not transdifferentiated  
162 into M4-like cells and instead seem to retain much of their AIA identity while  
163 gaining at least one M4 characteristic (i.e. *ceh-28* expression) later in life.

164

165 ***ctbp-1* mutants display an increasingly severe disruption of AIA**

166 **morphology**

167 Because of the time-dependency of the defect of *ctbp-1* mutants in AIA  
168 cell identity, we hypothesized that *ctbp-1* might act to maintain the AIA cell  
169 identity. To test this hypothesis, we examined morphological and functional  
170 aspects of AIA identity at both early and late larval stages. To assay AIA  
171 morphology, we generated a transgenic construct driving expression of GFP  
172 throughout the AIA cell (*nIs840[P<sub>gcy-28.d</sub>::gfp]*). We crossed this construct into  
173 *ctbp-1* mutant worms and visualized AIA morphology in L1 and L4 larvae as well



174 as in day 1 adults (Fig. 3A). We found that L1 *ctbp-1* mutant AIAs appeared  
175 grossly wild-type in morphology (Fig. 3A). However, older *ctbp-1* mutant AIAs  
176 had ectopic neurite branches that extended from both the anterior and posterior  
177 ends of the AIA cell body (Fig. 3A). The penetrance of these ectopic branches  
178 increased progressively in later larval stage and adult mutants (Fig. 3B-C). Older  
179 *ctbp-1* mutant AIAs also appeared to have an elongated cell body compared to  
180 wild-type AIAs. Quantification of this defect revealed that L4 and adult mutant  
181 AIA cell bodies, but not those of L1s, were significantly longer than their wild-type  
182 counterparts (Fig. 3D). To assess if this increase in AIA length was a  
183 consequence of an increase in AIA size, we measured the maximum area of the  
184 AIA cell body from cross-sections of these cells. We found that the maximum  
185 area of the AIA cell body did not significantly differ between wild-type and mutant  
186 AIAs at any stage (Fig. S4A), indicating that mutant AIAs were misshapen but not  
187 enlarged. To confirm that we were not biased by an awareness of genotype while  
188 measuring AIA lengths, we blinded the wild-type and *ctbp-1* AIA images used for  
189 length measurements and scored the blinded images as either “normal” or  
190 “elongated” (Fig. S4B). Again, at the L1 larval stage both wild-type and *ctbp-1*  
191 mutant AIAs appeared overwhelmingly “normal,” whereas at both the L4 larval  
192 stage and in day 1 adults *ctbp-1* mutant AIAs were scored as “elongated” at a  
193 consistently higher rate than their wild-type counterparts. Collectively, these  
194 results demonstrate that *ctbp-1* mutant AIAs display abnormal morphology and  
195 that the severity of the observed morphological defects in *ctbp-1* mutants  
196 increases from L1 to L4 to adulthood. Furthermore, the relative lack of AIA

197 morphological defects in L1 *ctbp-1* mutants suggests that *ctbp-1* is not required  
198 for the establishment of proper AIA morphology but instead acts to maintain AIA  
199 morphology over time.

200 We next asked if *ctbp-1* acts cell-autonomously and at later stages to  
201 regulate AIA morphology as it does for AIA gene expression. We visualized *ctbp-*  
202 *1* mutant AIAs carrying the AIA-specific *ctbp-1(+)* rescue construct  
203 *nls743[P<sub>AIA</sub>::ctbp-1(+)]* (Fig. 3E). We found that AIA-specific restoration of *ctbp-1*  
204 in mutant worms rescued all AIA morphological defects to near-wild-type levels at  
205 all stages tested, indicating that *ctbp-1* can act cell-autonomously to regulate AIA  
206 morphology (Fig. 3F-H). Next, we visualized *ctbp-1* mutant worms carrying the  
207 heat shock-inducible *ctbp-1(+)* rescue construct *nEx2351[P<sub>hsp</sub>::ctbp-1(+)]*. We  
208 found that while heat shock at the L4 stage did not restore *ctbp-1* mutant AIA  
209 morphology in day 1 adults back to wild-type, heat-shocked AIAs did appear less  
210 morphologically defective than did their non-heat-shocked counterparts and  
211 instead displayed morphological defects more similar in severity to that of mutant  
212 L4 AIAs (Fig. 3I-L), suggesting that restoration of *ctbp-1* activity is able to halt the  
213 progression of some aspects of the AIA morphological decline. From these data  
214 we conclude that *ctbp-1* can act cell-autonomously and in older worms to  
215 maintain aspects of AIA morphology in a manner similar to AIA gene expression.

216

### 217 ***ctbp-1* mutants display a progressive decline of AIA function**

218 The AIA interneurons integrate sensory information from a number of  
219 sensory neurons, resulting in modulation of the movement of the worm in

220 response to environmental stimuli [63–65]. The AIAs function in response to  
221 volatile odors and play an important role in learning associated with the sensation  
222 of volatile odors or salts [63,66]. We asked if *ctbp-1* mutants are abnormal in a  
223 behavior known to require the AIAs – adaptation to the volatile odor 2-butanone  
224 [66] – reasoning that if AIA function is disrupted in *ctbp-1* mutants, there should  
225 be a reduction of adaptation (and thus greater attraction) to butanone in *ctbp-1*  
226 worms relative to wild-type worms.

227 Consistent with previous studies [66], we found that worms that had been  
228 briefly starved and had no prior experience with butanone (so-called “naïve”  
229 worms) were generally attracted to the odor, while worms that were briefly  
230 starved in the presence of butanone (“conditioned” worms) adapted to the odor  
231 and exhibited mild repulsion to it (Fig. 4A-E). We next compared wild-type and  
232 *ctbp-1* mutant worms for their ability to adapt to butanone. We found that while  
233 L1 *ctbp-1* worms showed an ability to adapt to butanone roughly similar to that of  
234 their wild-type counterparts, conditioned L4 *ctbp-1* mutants displayed a  
235 significant increase in attraction to butanone relative to wild-type L4 animals,  
236 indicating a decrease in their ability to adapt to the odor (Fig. 4B-E). As a control,  
237 we assayed a strain carrying a transgenic construct that genetically ablates the  
238 AIA neurons, JN580. As expected, JN580 worms displayed decreased butanone  
239 adaptation at both the L1 and L4 larval stages. Thus, *ctbp-1* mutant worms  
240 displayed a defect in butanone adaptation similar to that of an AIA-ablated strain  
241 and did so only at a later larval stage, suggesting a potential loss of AIA function  
242 in older *ctbp-1* mutants. However, while *ctbp-1* mutant L4s exhibited weaker

243 butanone adaptation than their wild-type counterparts, this defect was not as  
244 severe as that of JN580 L4s, indicating that *ctbp-1* mutant AIAs might retain  
245 some function. Additionally, the lack of a butanone adaptation defect in L1 *ctbp-1*  
246 mutants similar to that of L1 JN580 worms further suggests that loss of *ctbp-1*  
247 does not disrupt early AIA function and shows that *ctbp-1* is not required for the  
248 establishment of functioning AIA neurons.

249 We next asked if *ctbp-1* can act cell-autonomously in the AIAs and in older  
250 worms to regulate butanone adaptation. We assayed *ctbp-1* mutants carrying the  
251 AIA-specific rescue construct *nls743[P<sub>AIA</sub>::ctbp-1(+)]* for butanone adaptation  
252 (Fig. 4B-E) and found that AIA-specific restoration of *ctbp-1* rescued butanone  
253 adaption of conditioned *ctbp-1* mutant L4s to near wild-type levels (Fig. 4E). We  
254 conclude that the butanone adaptation defect of *ctbp-1* mutants is caused by a  
255 disruption of AIA function and that *ctbp-1* can act cell-autonomously to regulate  
256 this AIA function. Next, we assayed *ctbp-1* mutants carrying the heat shock-  
257 inducible *ctbp-1(+)* rescue construct *nEx2351[P<sub>hsp</sub>::ctbp-1(+)]* for butanone  
258 adaptation. We found that restoration of *ctbp-1* by heat shock at the L4 larval  
259 stage rescued the butanone adaptation defect in day 1 adults, indicating that  
260 *ctbp-1* can act in older worms to maintain proper AIA function after the initial  
261 establishment of the AIA cell identity (Fig. 4F-G). Taken together, these data  
262 establish that loss of *ctbp-1* disrupts the function of the AIA neurons and that  
263 *ctbp-1* can act cell-autonomously and in older worms to maintain AIA function.

264 While conducting these assays, we observed that naïve *ctbp-1* mutant  
265 worms displayed a mildly weaker attraction to butanone than did their wild-type

266 counterparts at both the L1 and L4 larval stages (Fig. 4B,D). AIA-specific rescue  
267 of *ctbp-1* did not rescue this mild chemotaxis defect – naïve *ctbp-1* mutants  
268 carrying the  $P_{AIA}::ctbp-1(+)$  construct still displayed weaker butanone attraction  
269 than wild-type worms (Fig. 4B,D). We suggest that this defect in attraction to  
270 butanone is not a consequence of dysfunction of the AIAs but rather of some  
271 other cell(s) involved in butanone chemotaxis. Consistent with this hypothesis,  
272 we found that while *ctbp-1* mutants were defective in chemotaxis to the volatile  
273 odors diacetyl and isoamyl alcohol (Fig. S5A-B), the AIA-ablated strain JN580  
274 was not (Fig. S5A-B), indicating that *ctbp-1* mutant worms have a broader defect  
275 in chemotaxis caused by the disruption of the function of cells other than the  
276 AIAs. Because our primary focus has been on how *ctbp-1* functions to  
277 maintaining the AIA cell identity, we did not attempt to identify the other cells with  
278 functions perturbed by the loss of *ctbp-1*.

279

### 280 ***ctbp-1* mutant AIAs have additional defects in gene expression**

281 To better characterize the genetic changes occurring in mutant AIAs, we  
282 performed a single, exploratory single-cell RNA-Sequencing (scRNA-Seq)  
283 experiment comparing wild-type and *ctbp-1* mutant worms. We sequenced RNA  
284 from the neurons of wild-type and *ctbp-1* L4 worms and processed the resulting  
285 data using the 10X CellRanger pipeline to identify presumptive AIA neurons  
286 based on the expression of several AIA markers (*gcy-28*, *ins-1*, *cho-1*) shown  
287 above to be expressed in both wild-type and *ctbp-1* mutant AIAs (Fig. 2B).  
288 Confirming that these data captured changes in the AIA transcriptional profiles,

289 we found that *ctbp-1* mutant AIAs showed high levels of expression of *ceh-28*,  
290 while wild-type AIAs showed no detectable *ceh-28* expression (Fig. S6).

291 We analyzed AIA transcriptional profiles to identify genes that appeared to  
292 be either expressed in *ctbp-1* mutant AIAs and not expressed in wild-type AIAs  
293 (similar to *ceh-28*) or expressed in wild-type AIAs but not expressed in *ctbp-1*  
294 AIAs. To confirm candidate genes, we crossed existing reporters for those genes  
295 to *ctbp-1* mutants or, in cases for which reporters were not readily available,  
296 generated our own transgenic constructs. We identified and confirmed one gene  
297 that, similar to *ceh-28*, was not expressed in wild-type AIAs but was  
298 misexpressed in *ctbp-1* mutant AIAs: *acbp-6*, which is predicted to encode an  
299 acyl-Coenzyme A binding protein [67] (Fig. 5A). We also identified and confirmed  
300 two genes expressed in wild-type AIAs but not expressed in *ctbp-1* mutant AIAs:  
301 *sra-11*, which encodes a transmembrane serpentine receptor [68]; and *glr-2*,  
302 which encodes a glutamate receptor [69] (Fig. 5C,E). We visualized the *acbp-6*  
303 reporter *nEx3081[P<sub>acbp-6</sub>::gfp]*, the *sra-11* reporter *otIs123[P<sub>sra-11</sub>::gfp]* and the *glr-*  
304 *2* reporter *ivEx138[P<sub>glr-2</sub>::gfp]* in wild-type and *ctbp-1* L4 worms and confirmed  
305 that *acbp-6* was absent in wild-type AIAs but misexpressed in *ctbp-1* mutants  
306 (Fig. 5A-B), while both *sra-11* and *glr-2* were consistently expressed in wild-type  
307 AIAs but not expressed in the AIAs of *ctbp-1* mutants (Fig. 5C-F). We also  
308 visualized these reporters in L1 wild-type and *ctbp-1* worms and found that both  
309 *P<sub>acbp-6</sub>::gfp* and *P<sub>sra-11</sub>::gfp* displayed a time-dependence to their expression  
310 similar to that of *P<sub>ceh-28</sub>::gfp* – *P<sub>acbp-6</sub>::gfp* was rarely detectable in the AIAs of  
311 either wild-type or *ctbp-1* AIAs at the L1 stage but was consistently expressed in

312 *ctbp-1* mutant L4 AIAs (Fig. 5A-B), while  $P_{sra-11}::gfp$  was rarely detectable in the  
313 AIAs of either wild-type or *ctbp-1* mutant L1 worms but was expressed in the  
314 AIAs of most wild-type worms by the L4 stage while remaining off in the AIAs of  
315 most L4 *ctbp-1* mutants (Fig. 5C-D). These observations suggest that, like *ceh-*  
316 *28* expression, *acbp-6* and *sra-11* expression is regulated by *ctbp-1* primarily in  
317 the AIAs of late-stage larvae and adults. By contrast, *glr-2* was expressed in wild-  
318 type but not *ctbp-1* AIAs in both L1 and L4 larvae (Fig. 5E-F).

319         These data demonstrate that mutant AIAs fail to turn on and/or maintain  
320 the expression of genes characteristic of the adult AIA neuron (*sra-11* and *glr-2*)  
321 while misexpressing at least two genes uncharacteristic of AIA (*ceh-28* and *acbp-*  
322 *6*). That the majority of these abnormalities in AIA gene expression occurred long  
323 after the AIAs are generated during embryogenesis further supports the  
324 conclusion that *ctbp-1* does not act to establish the AIA cell identity.

325         Collectively, our findings concerning AIA gene expression, morphology  
326 and function demonstrate that *ctbp-1* acts to maintain the AIA cell identity, plays  
327 little to no role in the initial establishment of the AIA cell fate, and can act cell-  
328 autonomously and in older worms to maintain these aspects of the AIA identity.

329

### 330 ***egl-13* mutations suppress the *ctbp-1* mutant phenotype**

331         To investigate how *ctbp-1* acts to maintain AIA cell identity, we performed  
332 a mutagenesis screen for suppression of  $P_{ceh-28}::gfp$  misexpression in the AIAs of  
333 L4 *ctbp-1* mutants (Fig. 6A). Using a combination of Hawaiian SNP mapping [70]  
334 and whole-genome sequencing, we identified the gene *egl-13*, which encodes a

335 SOX family transcription factor, as a suppressor of *ctbp-1*. *egl-13* has been  
336 shown to act in the establishment of the BAG and URX cell fates and in vulval  
337 development of *C. elegans* [56,71], and its mammalian orthologs SOX5 and  
338 SOX6 act in neural fate determination [72,73]. We isolated three alleles of *egl-13*  
339 as *ctbp-1* suppressors: *n5937*, a mutation of the splice acceptor site at the  
340 beginning of the 6<sup>th</sup> exon of the *egl-13a* isoform resulting in a frameshift and early  
341 stop; *n6013*, a Q381ochre nonsense mutation towards the end of the *egl-13*  
342 transcript; and *n6313*, a 436-nucleotide deletion spanning the 7<sup>th</sup> and 8<sup>th</sup> exons of  
343 the *egl-13a* isoform (Figs. 6B; S7A-B). We generated and introduced a  
344 transgenic construct carrying a wild-type copy of *egl-13* under its native promoter  
345 into these mutant strains and found that this construct was capable of rescuing  
346 the suppression of *P<sub>ceh-28</sub>::gfp* misexpression by all three *egl-13* alleles,  
347 demonstrating that loss of *egl-13* function suppresses this aspect of the *ctbp-1*  
348 mutant phenotype and suggesting that these alleles are likely loss-of-function  
349 alleles of *egl-13* (Fig. S7C).

350 We assayed the loss-of-function allele of *egl-13* with the highest  
351 penetrance of suppression, *n5937*, for its ability to suppress *P<sub>ceh-28</sub>::gfp*  
352 misexpression over the course of larval development and into adulthood of *ctbp-*  
353 *1* mutant worms (Fig. 6C). *egl-13(n5937)* strongly suppressed *ctbp-1* at all  
354 stages, resulting in little to no misexpression of *P<sub>ceh-28</sub>::gfp* in the AIAs of *egl-13*  
355 *ctbp-1* double mutants at any larval stage or in day 1 adults.

356 To determine if, like *ctbp-1*, *egl-13* can act cell-autonomously in the AIAs,  
357 we generated a transgenic construct that drives expression of a wild-type copy of



358 *egl-13* in the AIAs (*nEx3055[P<sub>gcy-28.d::egl-13(+)</sub>]*). Introduction of this construct to  
359 *egl-13(n5937) ctbp-1* double mutants rescued the *egl-13* suppression of *P<sub>ceh-</sub>*  
360 *28.d::gfp* misexpression in the AIAs, indicating that *egl-13* can function cell-  
361 autonomously (Fig. S8A-B). These results suggest that, in the absence of *ctbp-1*  
362 function, ectopic *egl-13* activity drives *ceh-28* misexpression, and thus that *ctbp-1*  
363 likely normally acts to repress *egl-13* activity in the AIAs.

364 We next asked if *egl-13(n5937)* could suppress the AIA morphological and  
365 functional defects of *ctbp-1* mutants. To both test suppression of AIA  
366 morphological defects and confirm the presence of the AIA neurons in *egl-13*  
367 *ctbp-1* double mutants, we crossed the AIA morphology reporter *nIs840[P<sub>gcy-</sub>*  
368 *28.d::gfp]* into *egl-13 ctbp-1* double mutants and scored AIA morphology in L1, L4  
369 and day 1 adult worms (Fig. 6D-G). *egl-13 ctbp-1* double mutant AIAs displayed  
370 a mild (though significant) reduction in the penetrance of ectopic anterior neurites  
371 only in adult worms, no significant change in the frequency of posterior neurites  
372 at any stage, and a slight increase in AIA cell body length of L4 worms (though  
373 the difference was no longer significant in adults). These data demonstrate that  
374 loss of *egl-13* has little consistent effect on the AIA morphological defects caused  
375 by a loss of *ctbp-1* activity, suggesting that *ctbp-1* maintains AIA morphology  
376 primarily through *egl-13*-independent pathways.

377 We next assayed the ability of *egl-13(n5937)* to suppress AIA functional  
378 defects. We tested *egl-13 ctbp-1* double mutants for butanone adaptation and  
379 found that, at the L1 larval stage, this double mutant strain displayed a detectable  
380 response to butanone similar to *ctbp-1* single mutants (Fig. 6H-I). By contrast, at

381 the L4 larval stage, mutation of *egl-13* strongly suppressed the *ctbp-1* mutant  
382 defect in butanone adaptation, causing near wild-type levels of repulsion in  
383 conditioned worms (Fig. 6J-K). These results indicate that loss of *egl-13* activity  
384 suppressed AIA functional defects of *ctbp-1* mutant worms and suggest that  
385 *ctbp-1* maintains at least this aspect of AIA cellular function primarily through an  
386 *egl-13*-dependent pathway.

387 From these data we conclude that *ctbp-1* maintains AIA function and at  
388 least some aspects of AIA gene expression by antagonizing *egl-13* function and  
389 that *ctbp-1* likely also acts primarily through one or more *egl-13*-independent  
390 pathways to maintain AIA cellular morphology.

391

### 392 ***egl-13* regulates AIA function through control of *ceh-28* expression**

393 We next asked if mutation of *egl-13* could suppress other *ctbp-1* mutant  
394 AIA gene expression defects besides that of *ceh-28*. We crossed in *acbp-6*, *sra-*  
395 *11* and *glr-2* reporters to *egl-13 ctbp-1* double mutants and visualized reporter  
396 expression at the L1 and L4 larval stages. We found that mutation of *egl-13*  
397 suppressed  $P_{acbp-6}::gfp$  misexpression in the AIAs (Fig. 7A,D), just as *egl-13*  
398 mutation suppressed  $P_{ceh-28}::gfp$  misexpression. By contrast, mutation of *egl-13*  
399 had no effect on the loss of  $P_{sra-11}::gfp$  or  $P_{glr-2}::gfp$  expression in *ctbp-1* mutants  
400 (Fig. 7B-D). These results demonstrate that some, though not all, of the AIA gene  
401 expression defects seen in *ctbp-1* mutants are regulated through *egl-13*.

402 As *egl-13* is required for misexpression of both *ceh-28* and *acbp-6* as well  
403 as for disruption of AIA function in *ctbp-1* mutants, we hypothesized that

404 misexpressed *ceh-28* or *acbp-6* might be causally contributing to the observed  
405 AIA functional defect in *ctbp-1* mutants. If so, we expected that mutations that  
406 eliminated the functions of these ectopically expressed genes should restore AIA  
407 function in *ctbp-1* mutants. To test this hypothesis, we crossed mutant alleles of  
408 *ceh-28* (*cu11*) or *acbp-6* (*tm2995*) (both deletion alleles spanning greater than  
409 half their respective genes) to *ctbp-1*(*n4784*) mutants and assayed the resulting  
410 double mutants for butanone adaptation in L1 and L4 worms. We found that  
411 *acbp-6; ctbp-1* double mutants were nearly identical to both naïve and  
412 conditioned *ctbp-1* single mutants at both the L1 and L4 larval stages (Fig. 7E-H),  
413 indicating that misexpressed *acbp-6* is likely not responsible for the observed AIA  
414 functional defect. However, while conditioned *ctbp-1 ceh-28* double mutants  
415 appeared similar to both the wild type and *ctbp-1* single mutants at the L1 stage  
416 (Fig. 7I-J), these double mutants displayed an intermediate phenotype between  
417 wild-type and *ctbp-1* animals for adaptation at the L4 larval stage (Fig. 7K-L).  
418 These results suggest that overexpression of *ceh-28*, caused by a loss of *ctbp-1*  
419 and likely driven by ectopic *egl-13* activity, partially accounts for the defect in  
420 butanone adaptation seen in older *ctbp-1* mutants, and that removal of *egl-13* in  
421 part restores AIA function by eliminating *ceh-28* misexpression. We propose that  
422 *ctbp-1* functions to maintain aspects of the AIA cell identity by preventing *egl-13*  
423 from promoting *ceh-28* expression and that *ceh-28* misexpression can perturb  
424 proper AIA function. These results also indicate that *ceh-28* overexpression  
425 alone is not solely responsible for the observed AIA functional defect, suggesting

426 that the regulation of other, as-of-yet unidentified genes controlled by *ctbp-1* (and  
427 potentially *egl-13*) also contribute to the maintenance of the AIA cell identity.

## 428 **Discussion**

429           We have shown that the *ctbp-1* transcriptional corepressor gene is  
430 required to maintain AIA cell identity and that *ctbp-1* negatively and selectively  
431 regulates the function of the *egl-13* transcription factor gene. We suggest that  
432 the CTBP-1 protein functions as a transcriptional corepressor to selectively  
433 regulate the transcriptional output (either directly or indirectly) of the EGL-13  
434 protein. *ctbp-1* mutant AIAs undergo a progressive decline in their initially wild-  
435 type gene-expression pattern, morphology and function. *ctbp-1* can act cell-  
436 autonomously and is able to act in older animals to maintain these aspects of the  
437 AIA identity. We conclude that CTBP-1 functions to maintain AIA cell identity and  
438 speculate that other transcriptional corepressors similarly function in the  
439 maintenance of specific cell identities and do so by silencing undesired gene  
440 expression through repression of transcriptional activators, such as EGL-13.  
441 Such a mechanism could explain how the breadth of transcriptional activation by  
442 terminal selectors can be fine-tuned in a coordinated fashion to fit the  
443 requirements of specific cell types, with selective transcriptional silencing  
444 providing a crucial aspect of proper cell-identity maintenance.

445

### 446 **CTBP-1 might physically interact with EGL-13 to maintain the AIA cell** 447 **identity**

448           The mammalian CtBPs (CtBP1 and CtBP2) bind PXDLS-like motifs on a  
449 number of diverse transcription factors to target specific genetic loci for silencing  
450 [49–51]. The mammalian ortholog of EGL-13, SOX6, interacts with the

451 mammalian ortholog of CTBP-1, CtBP2, through a PLNLS motif located in SOX6  
452 [74]. This motif is 100% conserved in *C. elegans* EGL-13. We speculate that  
453 CTBP-1 interacts with EGL-13 through its PLNLS motif to regulate EGL-13  
454 activity as part of AIA cell-identity maintenance. Specifically, we propose (Fig. 8)  
455 that CTBP-1 physically interacts with EGL-13 to target specific genetic loci for  
456 silencing as an aspect of normal AIA cell-identity maintenance. Following the  
457 establishment of the AIA cell fate, for which CTBP-1 is not required, CTBP-1  
458 binds EGL-13, recruiting CTBP-1 to EGL-13 DNA binding sites. CTBP-1 then  
459 silences surrounding genetic loci, resulting in the repression of specific target  
460 genes (Fig. 8B). This repression is necessary for proper maintenance of the AIA  
461 cell identity, and when disrupted, as in *ctbp-1* mutants, CTBP-1 binding partners,  
462 such as EGL-13, inappropriately act as transcriptional activators in the AIAs,  
463 resulting in disruption of AIA gene expression, morphology and function (Fig.  
464 8C). In the absence of such CTBP-1 interactors, as in *egl-13 ctbp-1* double  
465 mutants, aberrant transcription is not activated and some of the defects in AIA  
466 maintenance are avoided (Fig. 8D).

467

468 **CTBP-1 likely utilizes additional transcription factors besides EGL-13 to**  
469 **maintain the AIA cell identity**

470 Our understanding of how CTBP-1 acts to maintain the AIA cell identity is  
471 incomplete. While we have identified a few genes with expression that changes  
472 in the absence of *ctbp-1* (*ceh-28*, *acbp-6*, *sra-11*, *glr-2*), none of these genes  
473 seems to individually account for the full range of AIA defects seen in older *ctbp-*

474 1 mutants. We speculate that there are many more unidentified transcriptional  
475 changes occurring in *ctbp-1* mutant AIAs that contribute to the observed AIA  
476 morphological and functional defects.

477 Our observations suggest that EGL-13 is not the sole transcription factor  
478 through which CTBP-1 functions to maintain AIA cell identity – neither AIA  
479 morphological defects nor some AIA gene-expression defects (i.e. *sra-11* and *glr-*  
480 *2* expression) in *ctbp-1* mutants were suppressed in *egl-13 ctbp-1* double  
481 mutants (Figs. 6D-G; 7A-B). We propose that CTBP-1 maintains different  
482 aspects of AIA cell identity through interactions with multiple different  
483 transcription factors. Given CTBP-1's known function as a transcriptional  
484 corepressor and EGL-13's observed role in driving gene misexpression in the  
485 absence of *ctbp-1*, we speculate that CTBP-1 likely utilizes not just EGL-13 but  
486 also other transcription factors (possibly through interacting with PXDLS-like  
487 motifs located in those transcription factors) to target multiple specific DNA  
488 sequences for transcriptional silencing, effectively turning these transcription  
489 factors into transcriptional repressors. When *ctbp-1* is absent, these unregulated  
490 transcription factors can aberrantly function as transcriptional activators, resulting  
491 in either the direct or indirect expression of genes which can in turn lead to  
492 defects in other aspects of cell identity. Such a mechanism for the selective and  
493 continuous silencing of multiple genetic loci in cell-type specific contexts by a  
494 transcriptional corepressor like CTBP-1 might explain how the broad activating  
495 activities of terminal selectors are restricted in the context of maintaining the  
496 identities of distinct cell types.

497

498 **CTBP-1 likely maintains the identities of other cells besides that of the AIAs**

499 Others have previously reported a near pan-neuronal expression pattern  
500 of *ctbp-1* in *C. elegans* [53], suggesting that *ctbp-1* might be acting in more cells  
501 than just the AIAs to maintain cell identities. Why then have we thus far only  
502 been able to identify defects in the maintenance of the AIA identity in *ctbp-1*  
503 mutants? We speculate that, like the relatively subtle defects we have observed  
504 in AIA gene expression, morphology and function, *ctbp-1* mutant defects in the  
505 maintenance of other cell identities might be similarly subtle and easily missed if  
506 not specifically sought. In addition, the AIAs might be particularly susceptible to  
507 perturbations of maintenance of their identity, with defects manifesting either  
508 earlier in the life of the cell or in more distinct ways (e.g. more gene  
509 misexpression).

510 Both our findings and the work of others [54,55] provide further support for  
511 the hypothesis that *ctbp-1* maintains other cell identities besides that of the AIAs.  
512 We observed that *ctbp-1* mutants have AIA-independent chemotaxis defects  
513 (Figs. 4B-E; S5A-B), suggesting that other cells, likely neurons that sense and/or  
514 execute responses to volatile odors, are also dysfunctional. Additionally, others  
515 have shown that, in *ctbp-1* mutants another pair of *C. elegans* neurons, the  
516 SMDDs, display late-onset morphological abnormalities coupled with a defect in  
517 *C. elegans* foraging behavior associated with these cells [54,55], indicating that  
518 CTBP-1 might act to maintain SMDD cell identity as well. The broad expression  
519 of *ctbp-1* throughout much of the *C. elegans* nervous system is also consistent



520 with the hypothesis that *ctbp-1* functions broadly to maintain multiple neuronal  
521 cell identities [53].

522

523 **Transcriptional corepressors might function broadly in the maintenance of**  
524 **cell identities**

525         The neuron-specific expression of *ctbp-1* [53] suggests that CTBP-1 likely  
526 does not function in maintaining the identities of non-neuronal cells. How might  
527 non-neuronal cell identities be maintained? We speculate that transcriptional  
528 corepressors function in maintaining cell identities in both neuronal and non-  
529 neuronal cells. There are known tissue-specific activities of other corepressor  
530 complexes, such as those of NCoR1 in mediating the downstream effects of  
531 hormone sensation in the mammalian liver [75,76] or of Transducin-Like  
532 Enhancer of Split (TLE) in regulating gene expression and chromatin state in the  
533 developing mouse heart and kidney [77–79]. We propose that, by analogy to  
534 CTBP-1, distinct transcriptional corepressors might specialize in the maintenance  
535 of a wide range of cell identities in distinct tissue types throughout metazoa.

## 536 **Materials and Methods**

### 537 ***C. elegans* strains and transgenes**

538 All *C. elegans* strains were grown on Nematode Growth Medium (NGM) plates

539 seeded with *E. coli* OP50 as described previously [80]. We used the N2 Bristol

540 strain as wild type. Worms were grown at 20°C unless otherwise indicated.

541 Standard molecular biology and microinjection methods, as previously described

542 [81], were used to generate transgenic worms.

543

544 The following strains were used in this study:

| Strain  | Genotype                                                         |
|---------|------------------------------------------------------------------|
| N2      | wild type                                                        |
| MT15670 | <i>nls175</i> [ <i>P<sub>ceh-28</sub>::gfp</i> ]                 |
| MT15672 | <i>nls177</i> [ <i>P<sub>ceh-28</sub>::gfp</i> ]                 |
| MT15677 | <i>nls175; ctbp-1(n4778)</i>                                     |
| MT16225 | <i>nls175; ctbp-1(n4784)</i>                                     |
| MT15688 | <i>nls175; ctbp-1(n4789)</i>                                     |
| MT15801 | <i>nls175; ctbp-1(n4800)</i>                                     |
| MT15805 | <i>nls175; ctbp-1(n4804)</i>                                     |
| MT15806 | <i>nls175; ctbp-1(n4805)</i>                                     |
| MT15809 | <i>nls175; ctbp-1(n4808)</i>                                     |
| MT15811 | <i>nls175; ctbp-1(n4810)</i>                                     |
| MT15813 | <i>nls175; ctbp-1(n4813)</i>                                     |
| MT15820 | <i>nls175; ctbp-1(n4819)</i>                                     |
| MT15824 | <i>nls175; ctbp-1(n4823)</i>                                     |
| MT15825 | <i>nls175; ctbp-1(n4824)</i>                                     |
| MT15841 | <i>nls177; ctbp-1(n4840)</i>                                     |
| MT15850 | <i>nls177; ctbp-1(n4849)</i>                                     |
| MT15853 | <i>nls177; ctbp-1(n4852)</i>                                     |
| MT15862 | <i>nls177; ctbp-1(n4861)</i>                                     |
| MT15865 | <i>nls177; ctbp-1(n4864)</i>                                     |
| MT15866 | <i>nls177; ctbp-1(n4865)</i>                                     |
| MT26446 | <i>nls175; ctbp-1(tm5512)</i>                                    |
| MT15918 | <i>nls175</i> introgressed into CB4856 “Hawaiian” background     |
| MT16295 | <i>nls177</i> introgressed into CB4856 background                |
| MT26522 | <i>nls175; ctbp-1(n4784)</i> introgressed into CB4856 background |
| MT23360 | <i>nls175; ctbp-1(n4784); nEx2346[ctbp-1(+)]</i>                 |

|         |                                                                                                          |
|---------|----------------------------------------------------------------------------------------------------------|
| MT23361 | <i>nls175; ctbp-1(n4784); nEx2347[ctbp-1(+)]</i>                                                         |
| MT23714 | <i>nls175; ctbp-1(n4784); nls743[P<sub>gcy-28.d</sub>::ctbp-1(+)]</i>                                    |
| MT25271 | <i>nls843[P<sub>gcy-28.d</sub>::mCherry]</i>                                                             |
| MT26437 | <i>nls175; ctbp-1(n4784); nls843</i>                                                                     |
| MT23365 | <i>nls175; ctbp-1(n4784); nEx2351[P<sub>hsp-16.2</sub>::ctbp-1(+); P<sub>hsp-16.41</sub>::ctbp-1(+)]</i> |
| MT18778 | <i>nls348[P<sub>ceh-28</sub>::mCherry]; lin-15AB(n765ts)</i>                                             |
| MT20844 | <i>nls348[P<sub>ceh-28</sub>::mCherry]; ctbp-1(n4784)</i>                                                |
| NH2466  | <i>ayls4[P<sub>egl-17</sub>::gfp]; dpy-20(e1282ts)</i>                                                   |
| MT26417 | <i>ayls4; nls348; ctbp-1(n4784)</i>                                                                      |
| BW1946  | <i>ctls43[P<sub>dbl-1</sub>::gfp] unc-42(e270)</i>                                                       |
| MT23726 | <i>nls348; ctls43 unc-42(e270); ctbp-1(n4784)</i>                                                        |
| MT20852 | <i>nls491[P<sub>ser-7.b</sub>::mCherry]</i>                                                              |
| MT23427 | <i>nls491; ctbp-1(n4784)</i>                                                                             |
| NY2080  | <i>ynls80[P<sub>flp-21</sub>::gfp]</i>                                                                   |
| MT23718 | <i>nls348; ctbp-1(n4784); ynls80</i>                                                                     |
| OH10237 | <i>otls326[P<sub>ins-1</sub>::gfp]</i>                                                                   |
| MT26422 | <i>ctbp-1(n4784); otls326</i>                                                                            |
| JN1716  | <i>pels1716[P<sub>ins-1s</sub>::gfp; P<sub>ttx-3</sub>::mCherry]</i>                                     |
| MT23717 | <i>nls348; ctbp-1(n4784); pels1716</i>                                                                   |
| OH11030 | <i>otls317[P<sub>mgl-1</sub>::mCherry]; otls379[P<sub>cho-1</sub>::gfp]</i>                              |
| MT26421 | <i>nls348; ctbp-1(n4784); otls317; otls379</i>                                                           |
| MT26420 | <i>ctbp-1(n4784); otls317</i>                                                                            |
| MT25268 | <i>nls840[P<sub>gcy-28.d</sub>::gfp]</i>                                                                 |
| MT25270 | <i>nls842[P<sub>gcy-28.d</sub>::gfp]</i>                                                                 |
| MT26412 | <i>nls348; ctbp-1(n4784); nls840</i>                                                                     |
| MT26438 | <i>nls348; ctbp-1(n4784); nls743; nls840</i>                                                             |
| MT26439 | <i>nls348; ctbp-1(n4784); nls840; nEx2351</i>                                                            |
| JN580   | <i>pels580[P<sub>ins-1s</sub>::casp1; P<sub>ins-1s</sub>::venus; P<sub>unc-122</sub>::gfp]</i>           |
| MT23746 | <i>nls175; egl-13(n5937) ctbp-1(n4784)</i>                                                               |
| MT24129 | <i>nls175; egl-13(n6013) ctbp-1(n4784)</i>                                                               |
| MT25352 | <i>nls175; egl-13(n6313) ctbp-1(n4784)</i>                                                               |
| MT26486 | <i>nls175; egl-13(n5937) ctbp-1(n4784); nEx3062[egl-13(+)]</i>                                           |
| MT26487 | <i>nls175; egl-13(n5937) ctbp-1(n4784); nEx3063[egl-13(+)]</i>                                           |
| MT26549 | <i>nls175; egl-13(n6013) ctbp-1(n4784); nEx3080[egl-13(+)]</i>                                           |
| MT26523 | <i>nls175; egl-13(n6313) ctbp-1(n4784); nEx3074[egl-13(+)]</i>                                           |
| MT26548 | <i>nls175; egl-13(n6313) ctbp-1(n4784); nEx3079[egl-13(+)]</i>                                           |
| MT26481 | <i>nls175; egl-13(n5937) ctbp-1(n4784); nEx3055[P<sub>gcy-28.d</sub>::egl-13(+)]</i>                     |
| MT26441 | <i>nls175; egl-13(n5937) ctbp-1(n4784); nls840</i>                                                       |
| MT26415 | <i>evls111[P<sub>rgef-1</sub>::gfp]; nls843</i>                                                          |
| MT26416 | <i>ctbp-1(n4784); evls111; nls843</i>                                                                    |
| MT26444 | <i>otls123[P<sub>sra-11</sub>::gfp]; nls843</i>                                                          |
| MT26445 | <i>nls348; ctbp-1(n4784); otls123</i>                                                                    |
| MT26524 | <i>nls348; egl-13(n5937) ctbp-1(n4784); otls123</i>                                                      |
| MT26504 | <i>nls843; ivEx138[P<sub>qlr-2</sub>::gfp]</i>                                                           |

|         |                                                     |
|---------|-----------------------------------------------------|
| MT26505 | <i>nls348; ctbp-1(n4784); ivEx138</i>               |
| MT26550 | <i>nls348; egl-13(n5937) ctbp-1(n4784); ivEx138</i> |
| MT26581 | <i>nls843; nEx3081[P<sub>acbp-6::gfp</sub>]</i>     |
| MT26551 | <i>nls348; ctbp-1(n4784); nEx3081</i>               |
| MT26582 | <i>nls348; egl-13(n5937) ctbp-1(n4784); nEx3081</i> |
| MT26605 | <i>acbp-6(tm2995); nls175; ctbp-1(n4784)</i>        |
| MT23725 | <i>nls175; ctbp-1(n4784) ceh-28(cu11)</i>           |

545

## 546 **Plasmid construction**

547 The *nls175[P<sub>ceh-28::gfp</sub>]*, *nls177[P<sub>ceh-28::gfp</sub>]* and *nls348[P<sub>ceh-28::mCherry</sub>]*  
548 transgenes have been previously described [59]. *nls743[P<sub>gcy-28.d::ctbp-1(+)</sub>]*  
549 contains 3.0 kb of the 5' promoter of *gcy-28.d* fused to the *ctbp-1a* coding region  
550 inserted into plasmid pPD49.26. *nls840[P<sub>gcy-28.d::gfp</sub>]* contains 3.0 kb of the 5'  
551 promoter of *gcy-28.d* inserted into pPD95.77. *nls843[P<sub>gcy-28.d::mCherry</sub>]* contains  
552 3.0 kb of the 5' promoter of *gcy-28.d* inserted into pPD122.56 containing  
553 mCherry. *nEx2351[P<sub>hsp-16.2::ctbp-1(+)</sub>;P<sub>hsp-16.41::ctbp-1(+)</sub>]* contains *ctbp-1a*  
554 cDNA, isolated by RT-PCR, inserted into pPD49.73 and pPD49.83.  
555 *nEx3055[P<sub>gcy-28.d::egl-13(+)</sub>]* contains 3.0 kb of the 5' promoter of *gcy-28.d* fused  
556 to the *egl-13* coding region inserted into pPD49.26. *nEx3081[P<sub>acbp-6::gfp</sub>]*  
557 contains 2.0 kb of the 5' promoter of *acbp-6* inserted into pPD122.56. Plasmid  
558 construction was performed using Infusion cloning enzymes (Takara Bio,  
559 Mountain View, CA).

560

## 561 **Mutagenesis screens**

562 *ctbp-1* mutants were isolated from genetic screens for mutations that cause the  
563 survival of the M4 sister cell as scored by extra GFP-positive cells carrying the  
564 M4-cell-specific markers *nls175[P<sub>ceh-28::gfp</sub>]* or *nls177[P<sub>ceh-28::gfp</sub>]* [58,59]. *egl-13*

565 mutants were isolated from genetic screens for mutations that suppress *nls175*  
566 misexpression in the AIAs of *ctbp-1(n4784)* mutants while retaining GFP  
567 expression in the M4 neuron. For both screens, mutagenesis was performed with  
568 ethyl methanesulfonate (EMS) as previously described [80]. Mutagenized P<sub>0</sub>  
569 animals were allowed to propagate, and their F<sub>2</sub> progeny were synchronized by  
570 hypochlorite treatment and screened at the L4 stage for extra GFP-positive cells  
571 (*ctbp-1* screens) or fewer GFP-positive cells (suppressor screens) on a  
572 dissecting microscope equipped to examine fluorescence. From both screens,  
573 mutant alleles were grouped into functional groups by complementation testing  
574 when possible. Mutants were mapped using SNP mapping [70] by crossing  
575 mutants to strains containing *nls175*, *nls177*, or *nls175;ctbp-1(n4784)*  
576 introgressed into the Hawaiian strain CB4856. Whole-genome sequencing was  
577 performed on mutants and a combination of functional groupings and mapping  
578 data suggested genes with mutations that were likely causal for the mutant  
579 phenotypes. Rescue of mutant phenotypes with wild-type *ctbp-1(+)* and *egl-13(+)*  
580 constructs as well as the mutant phenotype of a separately isolated deletion  
581 allele of *ctbp-1*, *tm5512*, confirmed the identities of the causal mutations.

582

### 583 **Microscopy**

584 All images were obtained using an LSM 800 confocal microscope (Zeiss) and  
585 ZEN software. Images were processed and prepared for publication using FIJI  
586 software and Adobe Illustrator.

587

## 588 **Heat-shock assays**

589 Rescue of AIA defects in older worms was assayed using the *nEx2351*[*P*<sub>*hsp-16.2*</sub>::*ctbp-1*; *P*<sub>*hsp-16.41*</sub>::*ctbp-1*] transgene. Worms were synchronized and grown at  
590 20°C. Subsets of L1 and L4 worms carrying *nEx2351* were removed from this  
591 population for scoring at the appropriate stages. At the L4 stage, half of the  
592 worms were heat-shocked at 34°C for 30 minutes and returned to 20°C for 24  
593 hours while the other half remained at 20°C throughout. After 24 hours, heat-  
594 shocked and non-heat-shocked worms carrying *nEx2351* were scored.  
595

596

## 597 **Single-cell RNA-sequencing**

598 **Dissociation of animals into cell suspensions.** Single-cell suspensions were  
599 generated as described [82–84] with minor modifications. Briefly, synchronized  
600 populations of worms were grown on NGM plates seeded with OP50 to the L4  
601 larval stage. Worms were harvested from these plates, washed three times with  
602 M9 buffer and treated with SDS-DTT (200 mM DTT, 0.25% SDS, 20 mM HEPES,  
603 3% sucrose, pH 8.0) for two to three minutes. Worms were washed five times  
604 with 1x PBS and treated with pronase (15 mg/mL) for 20-23 minutes. During the  
605 pronase treatment, worm suspensions were pipetted with a P200 pipette rapidly  
606 for four sets of 80 repetitions. The pronase treatment was stopped by the  
607 addition of L-15-10 media (90% L-15 media, 10% FBS). The suspension was  
608 then passed through a 35 µm nylon filter into a collection tube, washed once with  
609 1x PBS, and prepared for FACS.

610

611 **FACS of fluorescently-labeled neurons.** FACS was performed using a BD  
612 FACSAria III cell sorter running BD FACS Diva software. DAPI was added to  
613 samples at a final concentration of 1 µg/mL to label dead and dying cells. GFP-  
614 positive, DAPI-negative neurons were sorted from the single-cell suspension into  
615 1x PBS containing 1% FBS. Non-fluorescent and single-color controls were used  
616 to set gating parameters. Cells were then concentrated and processed for single-  
617 cell sequencing.

618

619 **Single-cell sequencing.** Samples were processed for single-cell sequencing  
620 using the 10X Genomics Chromium 3'mRNA-sequencing platform. Libraries were  
621 prepared using the Chromium Next GEM Single Cell 3' Kit v3.1 according to the  
622 manufacturer's protocol. The libraries were sequenced using an Illumina  
623 NextSeq 500 with 75 bp paired end reads.

624

625 **Single-cell RNA-sequencing data processing.** Data processing was performed  
626 using 10X Genomics' CellRanger software (v4.0.0). Reads were mapped to the  
627 *C. elegans* reference genome from Wormbase, version WBcel235. For  
628 visualization and analysis of data, we used 10X Genomics' Loupe Browser  
629 (v4.2.0). AIAs were identified by expression of multiple AIA markers confirmed to  
630 be expressed in both wild-type and *ctbp-1* mutant AIAs (i.e. *gcy-28*, *ins-1*, *cho-1*;  
631 Fig. 2B). Candidate genes for misexpression (either ectopic or missing) in mutant  
632 AIAs were identified and tested as described in the text.

633

## 634 **Morphology scoring**

635 We assayed AIA morphology by visualizing and imaging AIAs expressing *nls840*  
636 using an LSM 800 confocal microscope (Zeiss) and a 63x objective. AIA cell  
637 body length and area were quantified using FIJI software.

638

## 639 **Image blinding and scoring**

640 A subset of 60 wild-type and 60 *ctbp-1* mutant images per stage (randomly  
641 chosen from the existing images taken to measure AIA cell body length) were  
642 selected and the genotype of each was blinded. Blinded images were then  
643 scored as either “Normal” or “Elongated” in appearance in batches of 40 images  
644 (20 each of wild-type and *ctbp-1* mutant, randomly assorted), repeated three  
645 times per stage. Scored images were then matched back to their genotypes and  
646 percentage of AIAs scored as “Elongated” per genotype was calculated and  
647 graphed.

648

## 649 **Behavioral Assays**

650 **Butanone adaptation.** Assay conditions were adapted from Cho et al., 2016  
651 [66]. Staged worms were washed off non-crowded NGM plates seeded with *E.*  
652 *coli* OP50 with S basal. Worms were washed two times with S basal and split  
653 evenly into the “naïve” and “conditioned” populations. Naïve worms were  
654 incubated in 1 mL S basal for 90 minutes. Conditioned worms were incubated in  
655 1 mL S basal with 2-butanone diluted to a final concentration of 120  $\mu$ M for 90  
656 minutes. During conditioning, unseeded NGM plates were spotted with two 1  $\mu$ L



657 drops of 10% ethanol (“control”) and two 1  $\mu$ L drops of 2-butanone diluted in 10%  
658 ethanol at 1:1000 (“odor”) as well as four 1  $\mu$ L drops of 1 M NaN<sub>3</sub> at the same  
659 loci. After conditioning, both populations were washed three more times in S  
660 basal and placed at the center of the unseeded NGM plates. Worms were  
661 allowed to chemotax for two hours. Plates were moved to 4°C for 30-60 minutes  
662 to stop the assay and then scored. Worms that had left the origin were scored as  
663 chemotaxing to the odor spots (“#odor”) or control spots (“#control”), and a  
664 chemotaxis index was determined as  $(\#odor - \#control) / (\#odor + \#control)$ .  
665 Assays were repeated on at least three separate days with one to three plates  
666 per strain ran in parallel on any given day based on the number of appropriately-  
667 staged worms available. Plates in which fewer than 50 worms left the origin were  
668 not scored.

669

670 **Chemotaxis assays.** L4 worms were washed off non-crowded NGM plates  
671 seeded with *E. coli* OP50 with S basal. Worms were washed three times with S  
672 basal. Unseeded NGM plates were spotted with two 1  $\mu$ L drops of 100% ethanol  
673 (“control”) and two 1  $\mu$ L drops of diacetyl diluted in 100% ethanol at 1:1000 or  
674 two 1  $\mu$ L drops of isoamyl alcohol diluted in 100% ethanol at 1:100 (“odor”) as  
675 well as four 1  $\mu$ L drops of 1 M NaN<sub>3</sub> at the same loci. Worms were placed at the  
676 center of the unseeded NGM plates. Worms were allowed to chemotax for two  
677 hours. Plates were moved to 4°C for 30-60 minutes to stop the assay and then  
678 scored. Worms that had left the origin were scored, and a chemotaxis index was

679 determined as above. Assays were repeated on at least three separate days.

680 Plates in which fewer than 40 worms left the origin were not scored.

681

### 682 **Statistical analyses**

683 Unpaired t-tests were used for the comparisons of AIA gene expression, AIA

684 morphological features and chemotaxis indices between different genotypes.

685 Statistical tests were performed using GraphPad Prism software (GraphPad

686 Prism version 6.0h, RRID: SCR\_002798).

687

### 688 **Accession Number**

689 The GEO accession number for the RNA-Seq dataset in this paper is

690 GSE179484.

## 691 **Acknowledgments**

692 We thank N. An, R. Droste, S. Mitani, and the *Caenorhabditis* Genetics Center  
693 (CGC), which is funded by NIH Office of Research Infrastructure Programs (P40  
694 OD010440), for strains and reagents. We thank C. Diehl, E. Lee, C. Pender, S.  
695 Sando, V. Dwivedi, K. Burkhart, C. Fincher, C. Cho, G. Johnson, D. Lee, D.  
696 Ghosh, A. Amon, P. Reddien, and Horvitz laboratory members for discussion and  
697 advice.

698

## 699 **Funding**

### 700 **National Institutes of Health (GM024663)**

- 701 • Josh Saul
- 702 • H. Robert Horvitz

### 703 **National Institutes of Health (T32GM007287)**

- 704 • Josh Saul

### 705 **Howard Hughes Medical Institute**

- 706 • Josh Saul
- 707 • Takashi Hirose
- 708 • H. Robert Horvitz

### 709 **Friends of the McGovern Institute Fellowship (2733360)**

- 710 • Josh Saul

711

## 712 **Author Contributions**

713 H.R.H. supervised the project. T.H. initiated the project. J.S. and T.H. designed  
714 and performed experiments, generated reagents, and analyzed data. All authors  
715 contributed to interpretation of data. J.S. wrote the original manuscript draft. All  
716 authors contributed to review and editing of the manuscript.

717

## 718 **Declaration of Interests**

719 The authors declare no competing interests.

## 720 **References**

- 721 1. Davidson EH, Cameron RA, Ransick A. Specification of cell fate in the sea  
722 urchin embryo: summary and some proposed mechanisms. *Dev Camb Engl.*  
723 1998 Sep;125(17):3269–90.
- 724 2. Davidson EH. A Genomic Regulatory Network for Development. *Science.*  
725 2002 Mar 1;295(5560):1669–78.
- 726 3. Levine M, Davidson EH. Gene regulatory networks for development. *Proc*  
727 *Natl Acad Sci.* 2005 Apr 5;102(14):4936–42.
- 728 4. Hobert O. A map of terminal regulators of neuronal identity in  
729 *Caenorhabditis elegans*. *Wiley Interdiscip Rev Dev Biol.* 5(4):474–98.
- 730 5. Hsieh J, Zhao X. Genetics and Epigenetics in Adult Neurogenesis. *Cold*  
731 *Spring Harb Perspect Biol* [Internet]. 2016 Jun [cited 2021 Mar 18];8(6).  
732 Available from: <https://www.ncbi.nlm.nih.gov/pmc/articles/PMC4888816/>
- 733 6. Homem CCF, Repic M, Knoblich JA. Proliferation control in neural stem and  
734 progenitor cells. *Nat Rev Neurosci.* 2015 Nov;16(11):647–59.
- 735 7. Altun-Gultekin Z, Andachi Y, Tsalik EL, Pilgrim D, Kohara Y, Hobert O. A  
736 regulatory cascade of three homeobox genes, *ceh-10*, *ttx-3* and *ceh-23*,  
737 controls cell fate specification of a defined interneuron class in *C. elegans*.  
738 *Development.* 2001 Jun 1;128(11):1951–69.
- 739 8. Zeng H, Sanes JR. Neuronal cell-type classification: challenges,  
740 opportunities and the path forward. *Nat Rev Neurosci.* 2017 Sep;18(9):530–  
741 46.

- 742 9. Baker NE. Master regulatory genes; telling them what to do. *BioEssays*.  
743 2001;23(9):763–6.
- 744 10. Deneris ES, Hobert O. Maintenance of postmitotic neuronal cell identity. *Nat*  
745 *Neurosci*. 2014 Jul;17(7):899–907.
- 746 11. Hobert O, Carrera I, Stefanakis N. The molecular and gene regulatory  
747 signature of a neuron. *Trends Neurosci*. 2010 Oct 1;33(10):435–45.
- 748 12. Masoudi N, Tavazoie S, Glenwinkel L, Ryu L, Kim K, Hobert O.  
749 Unconventional function of an Achaete-Scute homolog as a terminal  
750 selector of nociceptive neuron identity. *PLOS Biol*. 2018 Apr  
751 19;16(4):e2004979.
- 752 13. Weintraub H, Dwarki VJ, Verma I, Davis R, Hollenberg S, Snider L, et al.  
753 Muscle-specific transcriptional activation by MyoD. *Genes Dev*. 1991 Aug  
754 1;5(8):1377–86.
- 755 14. Lassar AB. Finding MyoD and lessons learned along the way. *Semin Cell*  
756 *Dev Biol*. 2017 Dec;72:3–9.
- 757 15. Wardle FC. Master control: transcriptional regulation of mammalian MyoD. *J*  
758 *Muscle Res Cell Motil*. 2019 Jun;40(2):211–26.
- 759 16. Halder G, Callaerts P, Gehring WJ. Induction of ectopic eyes by targeted  
760 expression of the eyeless gene in *Drosophila*. *Science*. 1995 Mar  
761 24;267(5205):1788–92.
- 762 17. Gehring WJ. The master control gene for morphogenesis and evolution of  
763 the eye. *Genes Cells*. 1996;1(1):11–5.

- 764 18. Shen W, Mardon G. Ectopic eye development in *Drosophila* induced by  
765 directed dachshund expression. *Dev Camb Engl*. 1997 Jan;124(1):45–52.
- 766 19. Treisman JE. Retinal differentiation in *Drosophila*. *WIREs Dev Biol*.  
767 2013;2(4):545–57.
- 768 20. Lima Cunha D, Arno G, Corton M, Moosajee M. The Spectrum of PAX6  
769 Mutations and Genotype-Phenotype Correlations in the Eye. *Genes*. 2019  
770 Dec;10(12):1050.
- 771 21. Fukushige T, Hawkins MG, McGhee JD. The GATA-factor *elt-2* is essential  
772 for formation of the *Caenorhabditis elegans* intestine. *Dev Biol*. 1998 Jun  
773 15;198(2):286–302.
- 774 22. Fukushige T, Hendzel MJ, Bazett-Jones DP, McGhee JD. Direct  
775 visualization of the *elt-2* gut-specific GATA factor binding to a target  
776 promoter inside the living *Caenorhabditis elegans* embryo. *Proc Natl Acad*  
777 *Sci*. 1999 Oct 12;96(21):11883–8.
- 778 23. McGhee JD, Fukushige T, Krause MW, Minnema SE, Goszczynski B,  
779 Gaudet J, et al. *ELT-2* Is the Predominant Transcription Factor Controlling  
780 Differentiation and Function of the *C. elegans* Intestine, from Embryo to  
781 Adult. *Dev Biol*. 2009 Mar 15;327(2):551–65.
- 782 24. Block DH, Shapira M. GATA transcription factors as tissue-specific master  
783 regulators for induced responses. *Worm*. 2015 Oct 2;4(4):e1118607.
- 784 25. Matson CK, Murphy MW, Sarver AL, Griswold MD, Bardwell VJ, Zarkower  
785 D. *DMRT1* prevents female reprogramming in the postnatal mammalian  
786 testis. *Nature*. 2011 Aug 4;476(7358):101–4.

- 787 26. Mall M, Kareta MS, Chanda S, Ahlenius H, Perotti N, Zhou B, et al. Myt1l  
788 safeguards neuronal identity by actively repressing many non-neuronal  
789 fates. *Nature* [Internet]. 2017 Apr 5 [cited 2017 Apr 7];advance online  
790 publication. Available from:  
791 <http://www.nature.com/nature/journal/vaop/ncurrent/full/nature21722.html>
- 792 27. Simon HH, Thuret S, Alberi L. Midbrain dopaminergic neurons: control of  
793 their cell fate by the engrailed transcription factors. *Cell Tissue Res*. 2004  
794 Sep 1;318(1):53–61.
- 795 28. Vissers JHA, Froidi F, Schröder J, Papenfuss AT, Cheng LY, Harvey KF.  
796 The Scalloped and Nerfin-1 Transcription Factors Cooperate to Maintain  
797 Neuronal Cell Fate. *Cell Rep*. 2018 Nov 6;25(6):1561-1576.e7.
- 798 29. Hsiao H-Y, Jukam D, Johnston R, Desplan C. The neuronal transcription  
799 factor erect wing regulates specification and maintenance of *Drosophila* R8  
800 photoreceptor subtypes. *Dev Biol*. 2013 Sep 15;381(2):482–90.
- 801 30. Riddle MR, Weintraub A, Nguyen KCQ, Hall DH, Rothman JH.  
802 Transdifferentiation and remodeling of post-embryonic *C. elegans* cells by a  
803 single transcription factor. *Development*. 2013 Dec 15;140(24):4844–9.
- 804 31. O'Meara MM, Zhang F, Hobert O. Maintenance of Neuronal Laterality in  
805 *Caenorhabditis elegans* Through MYST Histone Acetyltransferase Complex  
806 Components LSY-12, LSY-13 and LIN-49. *Genetics*. 2010 Dec  
807 1;186(4):1497–502.



- 808 32. Xu J, Hao X, Yin M-X, Lu Y, Jin Y, Xu J, et al. Prevention of medulla neuron  
809 dedifferentiation by Nerfin-1 requires inhibition of Notch activity.  
810 Development. 2017 Apr 15;144(8):1510–7.
- 811 33. Hobert O. Regulatory logic of neuronal diversity: Terminal selector genes  
812 and selector motifs. Proc Natl Acad Sci. 2008 Dec 23;105(51):20067–71.
- 813 34. Hobert O. Regulation of Terminal Differentiation Programs in the Nervous  
814 System. Annu Rev Cell Dev Biol. 2011;27(1):681–96.
- 815 35. Hobert O, Kratsios P. Neuronal identity control by terminal selectors in  
816 worms, flies, and chordates. Curr Opin Neurobiol. 2019 Jun 1;56:97–105.
- 817 36. Hobert O. Terminal Selectors of Neuronal Identity. Curr Top Dev Biol.  
818 2016;116:455–75.
- 819 37. Zhang F, Bhattacharya A, Nelson JC, Abe N, Gordon P, Lloret-Fernandez C,  
820 et al. The LIM and POU homeobox genes *ttx-3* and *unc-86* act as terminal  
821 selectors in distinct cholinergic and serotonergic neuron types.  
822 Development. 2014 Jan 15;141(2):422–35.
- 823 38. Serrano-Saiz E, Poole RJ, Felton T, Zhang F, De La Cruz ED, Hobert O.  
824 Modular Control of Glutamatergic Neuronal Identity in *C. elegans* by Distinct  
825 Homeodomain Proteins. Cell. 2013 Oct 24;155(3):659–73.
- 826 39. Duggan A, Ma C, Chalfie M. Regulation of touch receptor differentiation by  
827 the *Caenorhabditis elegans* *mec-3* and *unc-86* genes. Dev Camb Engl. 1998  
828 Oct;125(20):4107–19.
- 829 40. Kim J, Yeon J, Choi S-K, Huh YH, Fang Z, Park SJ, et al. The Evolutionarily  
830 Conserved LIM Homeodomain Protein LIM-4/LHX6 Specifies the Terminal

- 831 Identity of a Cholinergic and Peptidergic C. elegans Sensory/Inter/Motor  
832 Neuron-Type. PLOS Genet. 2015 Aug 25;11(8):e1005480.
- 833 41. Alqadah A, Hsieh Y-W, Vidal B, Chang C, Hobert O, Chuang C-F.  
834 Postmitotic diversification of olfactory neuron types is mediated by  
835 differential activities of the HMG-box transcription factor SOX-2. EMBO J.  
836 2015 Oct 14;34(20):2574–89.
- 837 42. Kerk SY, Kratsios P, Hart M, Mourao R, Hobert O. Diversification of  
838 C. elegans Motor Neuron Identity via Selective Effector Gene Repression.  
839 Neuron. 2017 Jan 4;93(1):80–98.
- 840 43. Zhou HM, Walthall WW. UNC-55, an Orphan Nuclear Hormone Receptor,  
841 Orchestrates Synaptic Specificity among Two Classes of Motor Neurons in  
842 Caenorhabditis elegans. J Neurosci. 1998 Dec 15;18(24):10438–44.
- 843 44. Winnier AR, Meir JY-J, Ross JM, Tavernarakis N, Driscoll M, Ishihara T, et  
844 al. UNC-4/UNC-37-dependent repression of motor neuron-specific genes  
845 controls synaptic choice in Caenorhabditis elegans. Genes Dev. 1999 Nov  
846 1;13(21):2774–86.
- 847 45. Yu B, Wang X, Wei S, Fu T, Dzakah EE, Waqas A, et al. Convergent  
848 Transcriptional Programs Regulate cAMP Levels in C. elegans GABAergic  
849 Motor Neurons. Dev Cell. 2017 Oct 23;43(2):212-226.e7.
- 850 46. Wyler SC, Spencer WC, Green NH, Rood BD, Crawford L, Craige C, et al.  
851 Pet-1 Switches Transcriptional Targets Postnatally to Regulate Maturation of  
852 Serotonin Neuron Excitability. J Neurosci. 2016 Feb 3;36(5):1758–74.

- 853 47. Turner J, Crossley M. The CtBP family: enigmatic and enzymatic  
854 transcriptional co-repressors. *BioEssays*. 2001 Aug 1;23(8):683–90.
- 855 48. Chinnadurai G. CtBP, an Unconventional Transcriptional Corepressor in  
856 Development and Oncogenesis. *Mol Cell*. 2002 Feb;9(2):213–24.
- 857 49. Chinnadurai G. CtBP family proteins: More than transcriptional  
858 corepressors. *BioEssays*. 2003 Jan 1;25(1):9–12.
- 859 50. Shi Y, Sawada J, Sui G, Affar EB, Whetstine JR, Lan F, et al. Coordinated  
860 histone modifications mediated by a CtBP co-repressor complex. *Nature*.  
861 2003 Apr 17;422(6933):735–8.
- 862 51. Stankiewicz TR, Gray JJ, Winter AN, Linseman DA. C-terminal binding  
863 proteins: central players in development and disease. *Biomol Concepts*.  
864 2014;5(6):489–511.
- 865 52. Nicholas HR, Lowry JA, Wu T, Crossley M. The *Caenorhabditis elegans*  
866 Protein CTBP-1 Defines a New Group of THAP Domain-Containing CtBP  
867 Corepressors. *J Mol Biol*. 2008 Jan 4;375(1):1–11.
- 868 53. Reid A, Yücel D, Wood M, Llamosas E, Kant S, Crossley M, et al. The  
869 transcriptional repressor CTBP-1 functions in the nervous system of  
870 *Caenorhabditis elegans* to regulate lifespan. *Exp Gerontol*. 2014  
871 Dec;60:153–65.
- 872 54. Reid A, Sherry TJ, Yücel D, Llamosas E, Nicholas HR. The C-terminal  
873 binding protein (CTBP-1) regulates dorsal SMD axonal morphology in  
874 *Caenorhabditis elegans*. *Neuroscience*. 2015 Dec 17;311:216–30.

- 875 55. Sherry T, Handley A, Nicholas HR, Pocock R. Harmonization of L1CAM  
876 expression facilitates axon outgrowth and guidance of a motor neuron.  
877 Development [Internet]. 2020 Jan 1 [cited 2020 Oct 8]; Available from:  
878 <https://dev.biologists.org/content/early/2020/10/07/dev.193805>
- 879 56. Petersen JG, Romanos TR, Juozaityte V, Riveiro AR, Hums I, Traunmüller  
880 L, et al. EGL-13/SoxD Specifies Distinct O2 and CO2 Sensory Neuron Fates  
881 in *Caenorhabditis elegans*. PLOS Genet. 2013 May 9;9(5):e1003511.
- 882 57. Cinar HN, Richards KL, Oommen KS, Newman AP. The EGL-13 SOX  
883 domain transcription factor affects the uterine pi cell lineages in  
884 *Caenorhabditis elegans*. Genetics. 2003 Nov;165(3):1623–8.
- 885 58. Hirose T, Horvitz HR. An Sp1 transcription factor coordinates caspase-  
886 dependent and -independent apoptotic pathways. Nature. 2013  
887 Aug;500(7462):354–8.
- 888 59. Hirose T, Galvin BD, Horvitz HR. Six and Eya promote apoptosis through  
889 direct transcriptional activation of the proapoptotic BH3-only gene *egl-1* in  
890 *Caenorhabditis elegans*. Proc Natl Acad Sci. 2010 Aug 31;107(35):15479–  
891 84.
- 892 60. C. elegans Deletion Mutant Consortium. large-scale screening for targeted  
893 knockouts in the *Caenorhabditis elegans* genome. G3 Bethesda Md. 2012  
894 Nov;2(11):1415–25.
- 895 61. Ramakrishnan K, Okkema PG. Regulation of *C. elegans* Neuronal  
896 Differentiation by the ZEB-Family Factor ZAG-1 and the NK-2  
897 Homeodomain Factor CEH-28. PLOS ONE. 2014 Dec 4;9(12):e113893.

- 898 62. Ramakrishnan K, Ray P, Okkema PG. CEH-28 activates dbl-1 expression  
899 and TGF- $\beta$  signaling in the *C. elegans* M4 neuron. *Dev Biol.* 2014 Jun  
900 15;390(2):149–59.
- 901 63. Tomioka M, Adachi T, Suzuki H, Kunitomo H, Schafer WR, Iino Y. The  
902 Insulin/PI 3-Kinase Pathway Regulates Salt Chemotaxis Learning in  
903 *Caenorhabditis elegans*. *Neuron.* 2006 Sep 7;51(5):613–25.
- 904 64. Iino Y, Yoshida K. Parallel use of two behavioral mechanisms for  
905 chemotaxis in *Caenorhabditis elegans*. *J Neurosci Off J Soc Neurosci.* 2009  
906 Apr 29;29(17):5370–80.
- 907 65. Shinkai Y, Yamamoto Y, Fujiwara M, Tabata T, Murayama T, Hirotsu T, et  
908 al. Behavioral Choice between Conflicting Alternatives Is Regulated by a  
909 Receptor Guanylyl Cyclase, GCY-28, and a Receptor Tyrosine Kinase,  
910 SCD-2, in AIA Interneurons of *Caenorhabditis elegans*. *J Neurosci.* 2011  
911 Feb 23;31(8):3007–15.
- 912 66. Cho CE, Brueggemann C, L'Etoile ND, Bargmann CI. Parallel encoding of  
913 sensory history and behavioral preference during *Caenorhabditis elegans*  
914 olfactory learning. *eLife.* 2016 Jul 6;5:e14000.
- 915 67. Shaye DD, Greenwald I. OrthoList: A Compendium of *C. elegans* Genes  
916 with Human Orthologs. *PLOS ONE.* 2011 May 25;6(5):e20085.
- 917 68. Troemel ER, Chou JH, Dwyer ND, Colbert HA, Bargmann CI. Divergent  
918 seven transmembrane receptors are candidate chemosensory receptors in  
919 *C. elegans*. *Cell.* 1995 Oct 20;83(2):207–18.

- 920 69. Brockie PJ, Madsen DM, Zheng Y, Mellem J, Maricq AV. Differential  
921 Expression of Glutamate Receptor Subunits in the Nervous System of  
922 *Caenorhabditis elegans* and Their Regulation by the Homeodomain Protein  
923 UNC-42. *J Neurosci*. 2001 Mar 1;21(5):1510–22.
- 924 70. Davis MW, Hammarlund M, Harrach T, Hullett P, Olsen S, Jorgensen EM.  
925 Rapid single nucleotide polymorphism mapping in *C. elegans*. *BMC*  
926 *Genomics*. 2005;6:118.
- 927 71. Feng G, Yi P, Yang Y, Chai Y, Tian D, Zhu Z, et al. Developmental stage-  
928 dependent transcriptional regulatory pathways control neuroblast lineage  
929 progression. *Development*. 2013 Sep 15;140(18):3838–47.
- 930 72. Ji EH, Kim J. SoxD Transcription Factors: Multifaceted Players of Neural  
931 Development. *Int J Stem Cells*. 2016 May 30;9(1):3–8.
- 932 73. Saleem M, Barturen-Larrea P, Gomez JA. Emerging roles of Sox6 in the  
933 renal and cardiovascular system. *Physiol Rep*. 2020 Nov;8(22):e14604.
- 934 74. Murakami A, Ishida S, Thurlow J, Revest J-M, Dickson C. SOX6 binds  
935 CtBP2 to repress transcription from the Fgf-3 promoter. *Nucleic Acids Res*.  
936 2001 Aug 15;29(16):3347–55.
- 937 75. Feng X, Jiang Y, Meltzer P, Yen PM. Transgenic Targeting of a Dominant  
938 Negative Corepressor to Liver Blocks Basal Repression by Thyroid  
939 Hormone Receptor and Increases Cell Proliferation\*. *J Biol Chem*. 2001 Jan  
940 1;276(18):15066–72.
- 941 76. Mottis A, Mouchiroud L, Auwerx J. Emerging roles of the corepressors  
942 NCoR1 and SMRT in homeostasis. *Genes Dev*. 2013 Apr 15;27(8):819–35.

- 943 77. Sharma M, Brantley JG, Vassmer D, Chaturvedi G, Baas J, Vanden Heuvel  
944 GB. The homeodomain protein Cux1 interacts with Grg4 to repress p27kip1  
945 expression during kidney development. *Gene*. 2009 Jun 15;439(1):87–94.
- 946 78. Kaltenbrun E, Greco TM, Slagle CE, Kennedy LM, Li T, Cristea IM, et al. A  
947 Gro/TLE-NuRD Corepressor Complex Facilitates Tbx20-Dependent  
948 Transcriptional Repression. *J Proteome Res*. 2013 Dec 6;12(12):5395–409.
- 949 79. Agarwal M, Kumar P, Mathew SJ. The Groucho/Transducin-like enhancer of  
950 split protein family in animal development. *IUBMB Life*. 2015 Jul  
951 1;67(7):472–81.
- 952 80. Brenner S. The Genetics of CAENORHABDITIS ELEGANS. *Genetics*. 1974  
953 May;77(1):71–94.
- 954 81. Mello CC, Kramer JM, Stinchcomb D, Ambros V. Efficient gene transfer in  
955 *C.elegans*: extrachromosomal maintenance and integration of transforming  
956 sequences. *EMBO J*. 1991 Dec;10(12):3959–70.
- 957 82. Taylor SR, Santpere G, Reilly M, Glenwinkel L, Poff A, McWhirter R, et al.  
958 Expression profiling of the mature *C. elegans* nervous system by single-cell  
959 RNA-Sequencing. *bioRxiv*. 2019 Aug 17;737577.
- 960 83. Kaletsky R, Lakhina V, Arey R, Williams A, Landis J, Ashraf J, et al. The *C.*  
961 *elegans* adult neuronal IIS/FOXO transcriptome reveals adult phenotype  
962 regulators. *Nature*. 2016 Jan;529(7584):92–6.
- 963 84. Zhang S. Cell isolation and culture. *WormBook*. 2013 Feb 21;1–39.
- 964

965 **Figures**

966

Figure 1

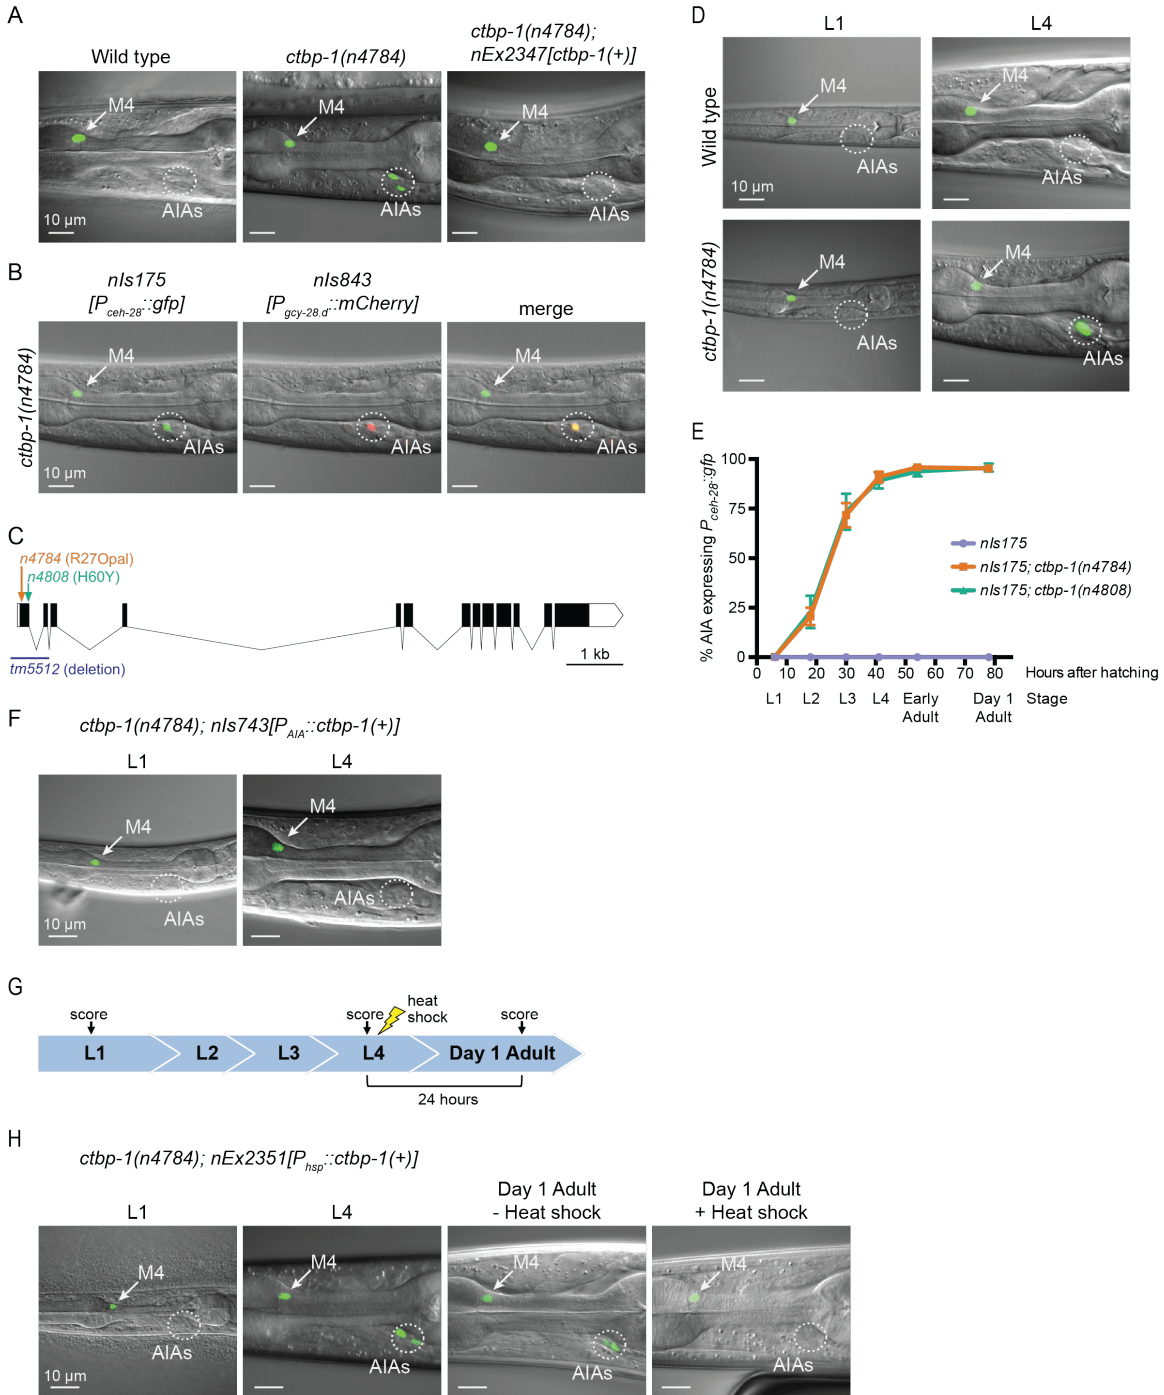

967

968 **Figure 1. *ctbp-1* mutants misexpress  $P_{cdh-28}::gfp$  in the AIA neurons**



969 (A) Expression of the M4-specific marker *nls175*[*P<sub>ceh-28</sub>::gfp*] in the wild type (left  
970 panel), a *ctbp-1*(*n4784*) mutant (middle panel), and a *ctbp-1* mutant carrying an  
971 extrachromosomal array expressing wild-type *ctbp-1* under its native promoter  
972 (*nEx2347*) (right panel). Arrow, M4 neuron. Circle, AIAs. Scale bar, 10  $\mu$ m.

973 (B) A *ctbp-1*(*n4784*) mutant expressing *nls175* (left panel) and the AIA marker  
974 *nls843*[*P<sub>gcy-28.d</sub>::mCherry*] (middle panel). Merge, right panel. Arrow, M4 neuron.  
975 Circle, AIAs. Scale bar, 10  $\mu$ m.

976 (C) Gene diagram of the *ctbp-1a* isoform. Arrows (above), point mutations. Line  
977 (below), deletion. Scale bar (bottom right), 1 kb. Additional *ctbp-1* alleles are  
978 shown in Fig. S1B.

979 (D) *nls175* expression in wild-type (top) and *ctbp-1*(*n4784*) (bottom) worms at the  
980 L1 larval stage (left) and L4 larval stage (right). Arrow, M4 neuron. Circle, AIAs.  
981 Scale bar, 10  $\mu$ m.

982 (E) Percentage of wild-type, *ctbp-1*(*n4784*), and *ctbp-1*(*n4808*) worms expressing  
983 *nls175* in the AIA neurons over time. Time points correspond to the L1, L2, L3,  
984 and L4 larval stages, early adult, and day 1 adult worms (indicated below X axis).  
985 Mean  $\pm$  SEM.  $n \geq 60$  worms scored per strain per stage, 4 biological replicates.

986 (F) Expression of *nls175* in *ctbp-1* mutants containing a transgene driving  
987 expression of wild-type *ctbp-1* under an AIA-specific promoter (*nls743*[*P<sub>gcy-</sub>*  
988 *28.d*::*ctbp-1*(+)] in L1 and L4 larval worms. Arrow, M4 neuron. Circle, AIAs. Scale  
989 bar, 10  $\mu$ m.

990 (G) Schematic for the heat shock experiment shown in Fig. 1H.

991 (H) *nls175* expression in *ctbp-1(n4784)* mutants carrying the heat shock-  
 992 inducible transgene *nEx2351[P<sub>hsp-16.2</sub>::ctbp-1(+);P<sub>hsp-16.41</sub>::ctbp-1(+)]*. Arrow, M4  
 993 neuron. Circle, AIAs. Scale bar, 10  $\mu$ m.  
 994 All strains shown contain the transgene *nls175[P<sub>ceh-28</sub>::gfp]*.  
 995 Images are oriented such that left corresponds to anterior, top to dorsal.  
 996

Figure 2

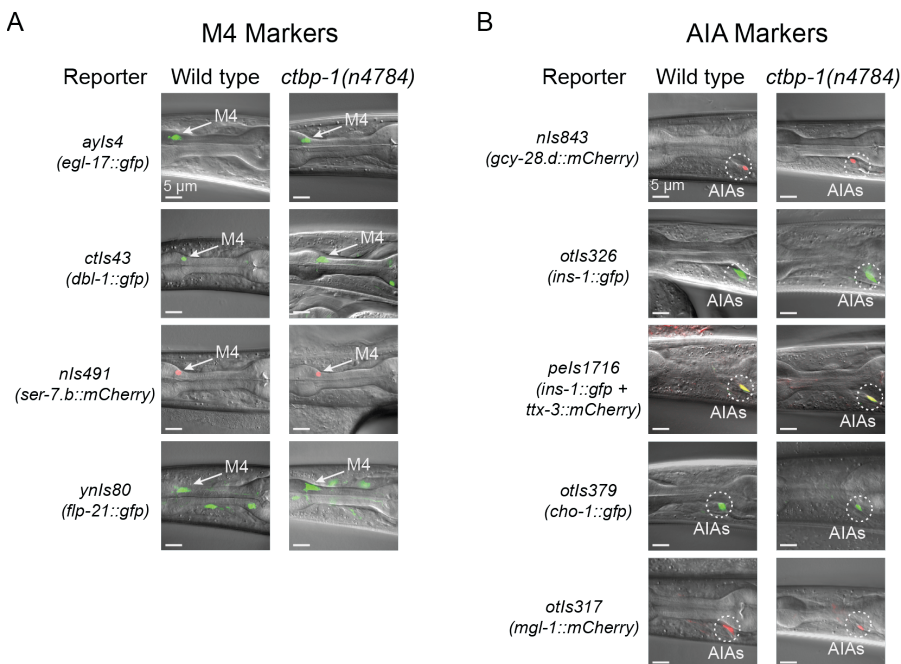

997

998 **Figure 2. *ctbp-1* mutant AIAs retain multiple aspects of their AIA gene**

999 **expression profile**

1000 (A-B) Expression of (A) M4 markers *egl-17*, *dbl-1*, *ser-7.b* and *flp-21* and (B) AIA  
 1001 markers *gcy-28.d*, *ins-1*, *ttx-3*, *cho-1* and *mgl-1* in wild-type (left image) and *ctbp-*  
 1002 *1(n4784)* (right image) L4 larval worms. Arrow, M4 neuron. Circles, AIAs. Scale  
 1003 bar, 5  $\mu$ m.

1004 Images are oriented such that left corresponds to anterior, top to dorsal.

1005

Figure 3

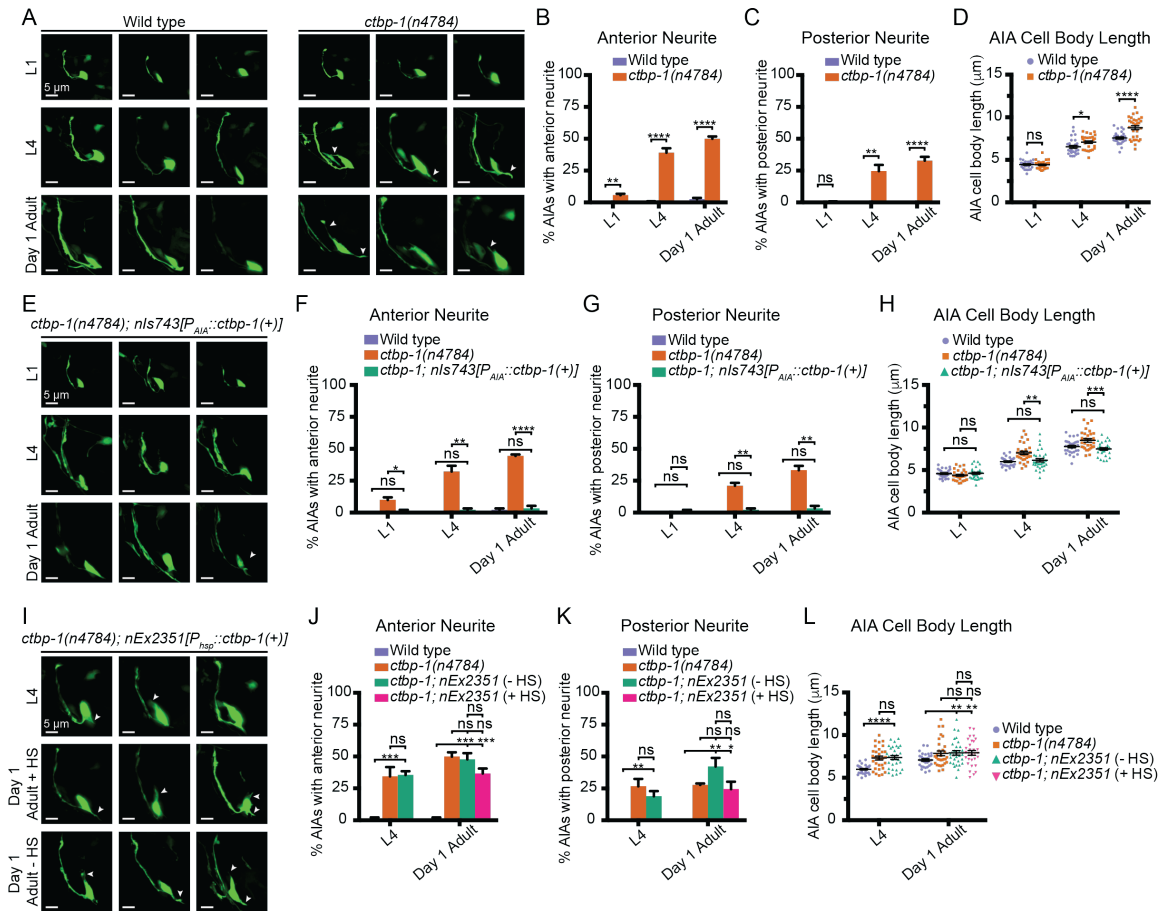

1006

1007 **Figure 3. Loss of *ctbp-1* results in a progressive decline in AIA morphology**

1008 (A) Three representative images of an AIA neuron in wild-type (left) and *ctbp-*  
1009 *1(n4784)* (right) worms at L1 (top), L4 (middle) and day 1 adult (bottom) stages.

1010 Arrows, examples of ectopic neurites protruding from the AIA cell body. Scale  
1011 bar, 5  $\mu\text{m}$ .

1012 (B-C) Percentage of AIAs in wild-type and *ctbp-1* worms at the L1, L4 and day 1  
1013 adult stages with an ectopic neurite protruding from the (B) anterior or (C)  
1014 posterior of the AIA cell body. Mean  $\pm$  SEM.  $n = 60$  AIAs scored per strain per

1015 stage, 4 biological replicates. ns, not significant, \*\* $p < 0.01$ , \*\*\*\* $p < 0.0001$ ,  
1016 unpaired t-test.

1017 (D) Quantification of AIA cell body length in wild-type and *ctbp-1* worms at the  
1018 L1, L4 and day 1 adult stages. Mean  $\pm$  SEM.  $n = 30$  AIAs scored per strain per  
1019 stage. ns, not significant, \* $p < 0.05$ , \*\*\*\* $p < 0.0001$ , unpaired t-test.

1020 (E) Three representative images of an AIA neuron in *ctbp-1; nIs743[P<sub>gcy-28.d::ctbp-1(+)</sub>]*  
1021 worms at L1 (top), L4 (middle) and day 1 adult (bottom) stages.  
1022 Arrows, examples of ectopic neurites protruding from the AIA cell body. Scale  
1023 bar, 5  $\mu$ m.

1024 (F-G) Percentage of AIAs in wild-type, *ctbp-1* and *ctbp-1; nIs743* worms at the  
1025 L1, L4 and day 1 adult stages with an ectopic neurite protruding from the (F)  
1026 anterior or (G) posterior of the AIA cell body. Mean  $\pm$  SEM.  $n = 30$  AIAs scored  
1027 per strain per stage, 3 biological replicates. ns, not significant, \* $p < 0.05$ , \*\* $p < 0.01$ ,  
1028 \*\*\*\* $p < 0.0001$ , unpaired t-test.

1029 (H) Quantification of AIA cell body length in wild-type, *ctbp-1* and *ctbp-1; nIs743*  
1030 worms at the L1, L4 and day 1 adult stages. Mean  $\pm$  SEM.  $n \geq 30$  AIAs scored  
1031 per strain per stage. ns, not significant, \*\* $p < 0.01$ , \*\*\* $p < 0.001$ , unpaired t-test.

1032 (I) Three representative images of an AIA neuron in *ctbp-1; nEx2351[P<sub>hsp-16.2::ctbp-1(+); P<sub>hsp-16.41::ctbp-1(+)</sub>]</sub>*  
1033 worms at L4 (top), day 1 adult with heat shock  
1034 (HS) (middle) and day 1 adult without heat shock (bottom). Arrows, examples of  
1035 ectopic neurites protruding from the AIA cell body. Scale bar, 5  $\mu$ m.

1036 (J-K) Percentage of AIAs in wild-type, *ctbp-1* and *ctbp-1; nEx2351* worms at L4  
1037 and day 1 adult (with or without heat shock) stages with an ectopic neurite

1038 protruding from the (J) anterior or (K) posterior of the AIA cell body. Mean  $\pm$   
1039 SEM.  $n = 30$  AIAs scored per strain per stage, 3 biological replicates. ns, not  
1040 significant, \* $p < 0.05$ , \*\* $p < 0.01$ , \*\*\* $p < 0.001$ , unpaired t-test.

1041 (L) Quantification of AIA cell body length in wild-type, *ctbp-1* and *ctbp-1*;  
1042 *nEx2351* worms at L4 and day 1 adult (with or without heat shock) stages. Mean  
1043  $\pm$  SEM.  $n \geq 30$  AIAs scored per strain per stage. ns, not significant, \*\* $p < 0.01$ ,  
1044 \*\*\*\* $p < 0.0001$ , unpaired t-test.

1045 The *ctbp-1* allele used for all panels of this figure was *n4784*.

1046 All strains contain *nls840[P<sub>gcy-28.d</sub>::gfp]*, and all strains other than “Wild type”  
1047 contain *nls348[P<sub>ceh-28</sub>::mCherry]* (not shown in images).

1048 Images are oriented such that left corresponds to anterior, top to dorsal.

1049

Figure 4

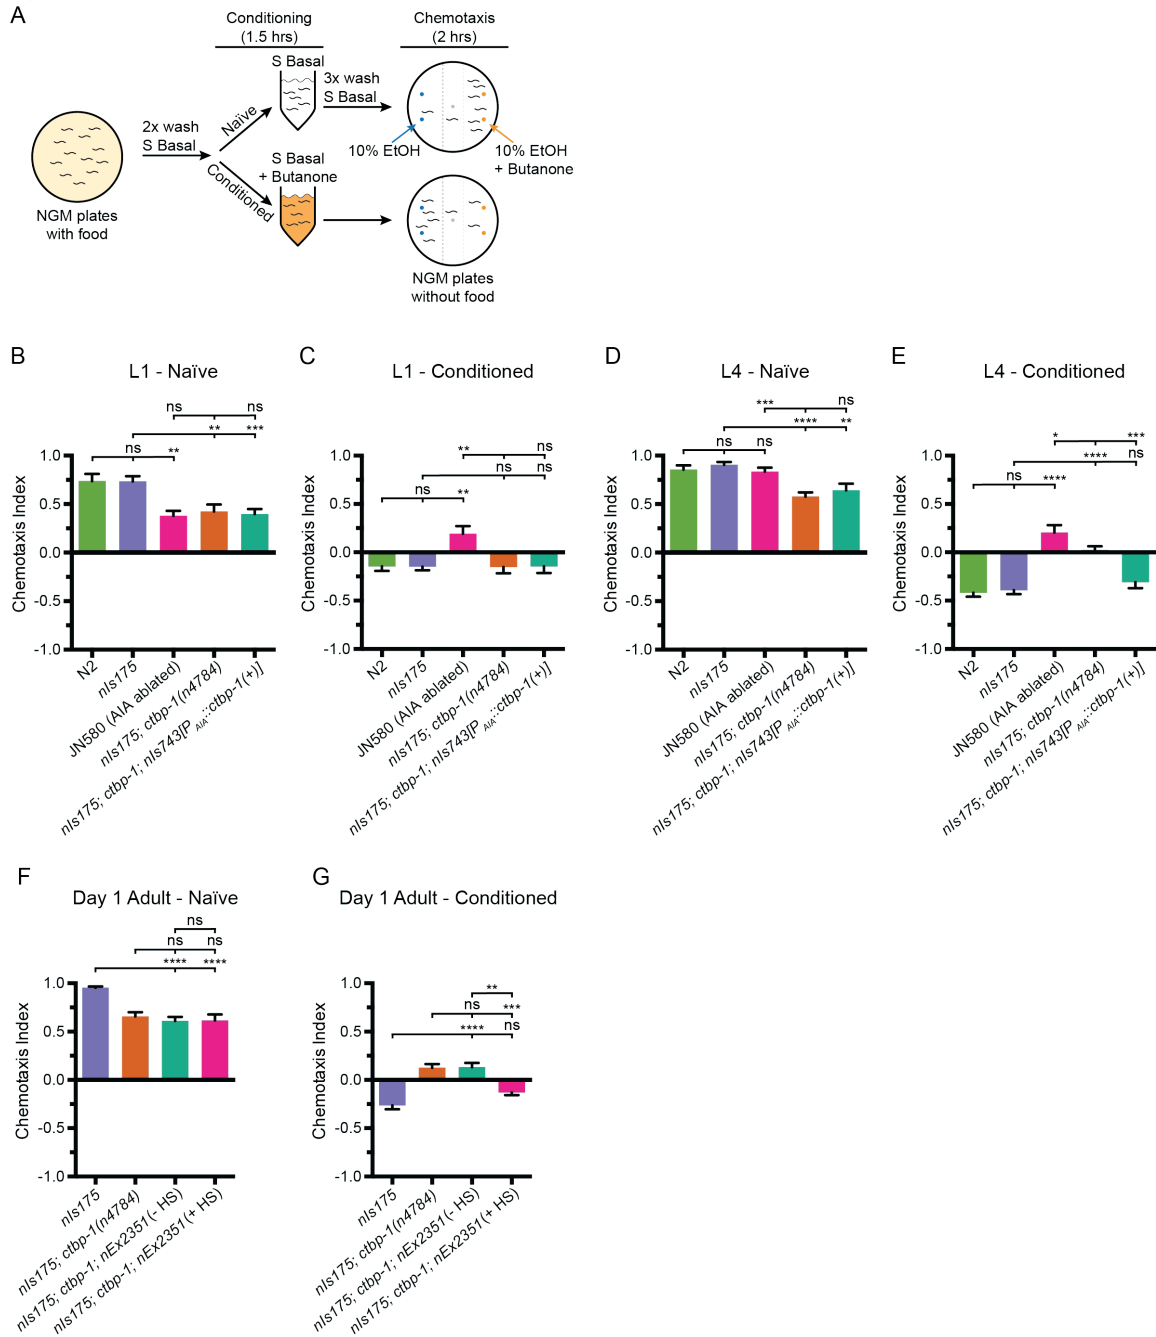

1050

1051 **Figure 4. Loss of *ctbp-1* results in a disruption of AIA function in older**

1052 **worms**

1053 (A) Schematic of the butanone adaptation assay. L1 or L4 worms from

1054 synchronized populations were washed off plates with S Basal, washed with S

1055 Basal, split into naïve and conditioned populations, incubated in S Basal with or  
1056 without 2-butanone for 1.5 hours, washed again with S Basal, allowed to  
1057 chemotax for two hours on unseeded plates containing two 1 µl spots of 10%  
1058 ethanol (blue dots) and 2-butanone diluted in 10% ethanol (orange dots), and  
1059 then scored.

1060 (B-E) Chemotaxis indices of (B,D) naïve or (C,E) conditioned wild-type (N2 and  
1061 *nls175*), AIA-ablated (JN580), *nls175; ctbp-1(n4784)*, and *nls175; ctbp-1* mutants  
1062 containing a transgene driving expression of wild-type *ctbp-1* under an AIA-  
1063 specific promoter (*nls743[P<sub>gcy-28.d</sub>::ctbp-1(+)]*) at the (B-C) L1 or (D-E) L4 larval  
1064 stage. Mean ± SEM. *n* ≥ 6 assays per condition, ≥ 50 worms per assay. ns, not  
1065 significant, \**p*<0.05, \*\**p*<0.01, \*\*\**p*<0.001, \*\*\*\**p*<0.0001, unpaired t-test.

1066 (F-G) Chemotaxis indices of (F) naïve or (G) conditioned *nls175*, *nls175; ctbp-1*,  
1067 and *nls175; ctbp-1* mutants carrying the heat-shock-inducible transgene  
1068 *nEx2351[P<sub>hsp-16.2</sub>::ctbp-1(+);P<sub>hsp-16.41</sub>::ctbp-1(+)]* with or without heat shock (HS)  
1069 at the day 1 adult stage. Mean ± SEM. *n* ≥ 5 assays per condition, ≥ 50 worms  
1070 per assay. ns, not significant, \*\**p*<0.01, \*\*\**p*<0.001, \*\*\*\**p*<0.0001, unpaired t-test.

1071 The *ctbp-1* allele used for all panels of this figure was *n4784*.

1072

Figure 5

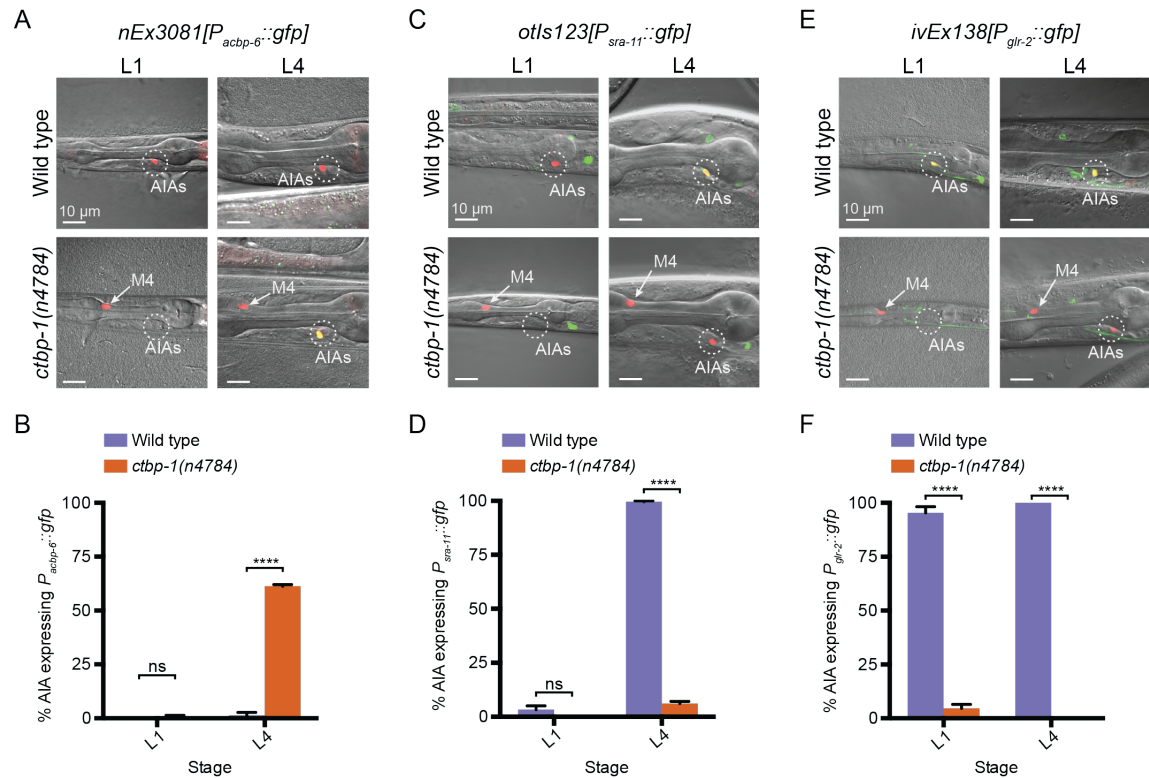

1073

1074 **Figure 5. Loss of *ctbp-1* results in a disruption to normal AIA gene**  
 1075 **expression**

1076 (A,C,E) (A)  $nEx3081[P_{acbp-6}::gfp]$ , (C)  $otIs123[P_{sra-11}::gfp]$ , or (E)  $ivEx138[P_{glr-2}::gfp]$  expression in wild-type (top) and *ctbp-1(n4784)* (bottom) worms at the L1  
 1077 larval stage (left) and L4 larval stage (right). Wild-type strains contain  $nIs843[P_{gcy-28.d}::mCherry]$ . *ctbp-1* mutant strains contain  $nIs348[P_{ceh-28}::mCherry]$ . Arrow, M4  
 1078 neuron. Circle, AIAs. Scale bar, 10  $\mu$ m.

1081 (B,D,F) Percentage of wild-type and *ctbp-1(n4784)* expressing (B)  $P_{acbp-6}::gfp$ , (D)  
 1082  $P_{sra-11}::gfp$ , or (F)  $P_{glr-2}::gfp$  in the AIA neurons at L1 and L4 larval stages. Wild-  
 1083 type strains contain  $nIs843[P_{gcy-28.d}::mCherry]$ . *ctbp-1* mutant strains contain  
 1084  $nIs348[P_{ceh-28}::mCherry]$ . Mean  $\pm$  SEM.  $n \geq 50$  worms per strain per stage, 3  
 1085 biological replicates. ns, not significant, \*\*\*\* $p < 0.0001$ , unpaired t-test.



1086

Figure 6

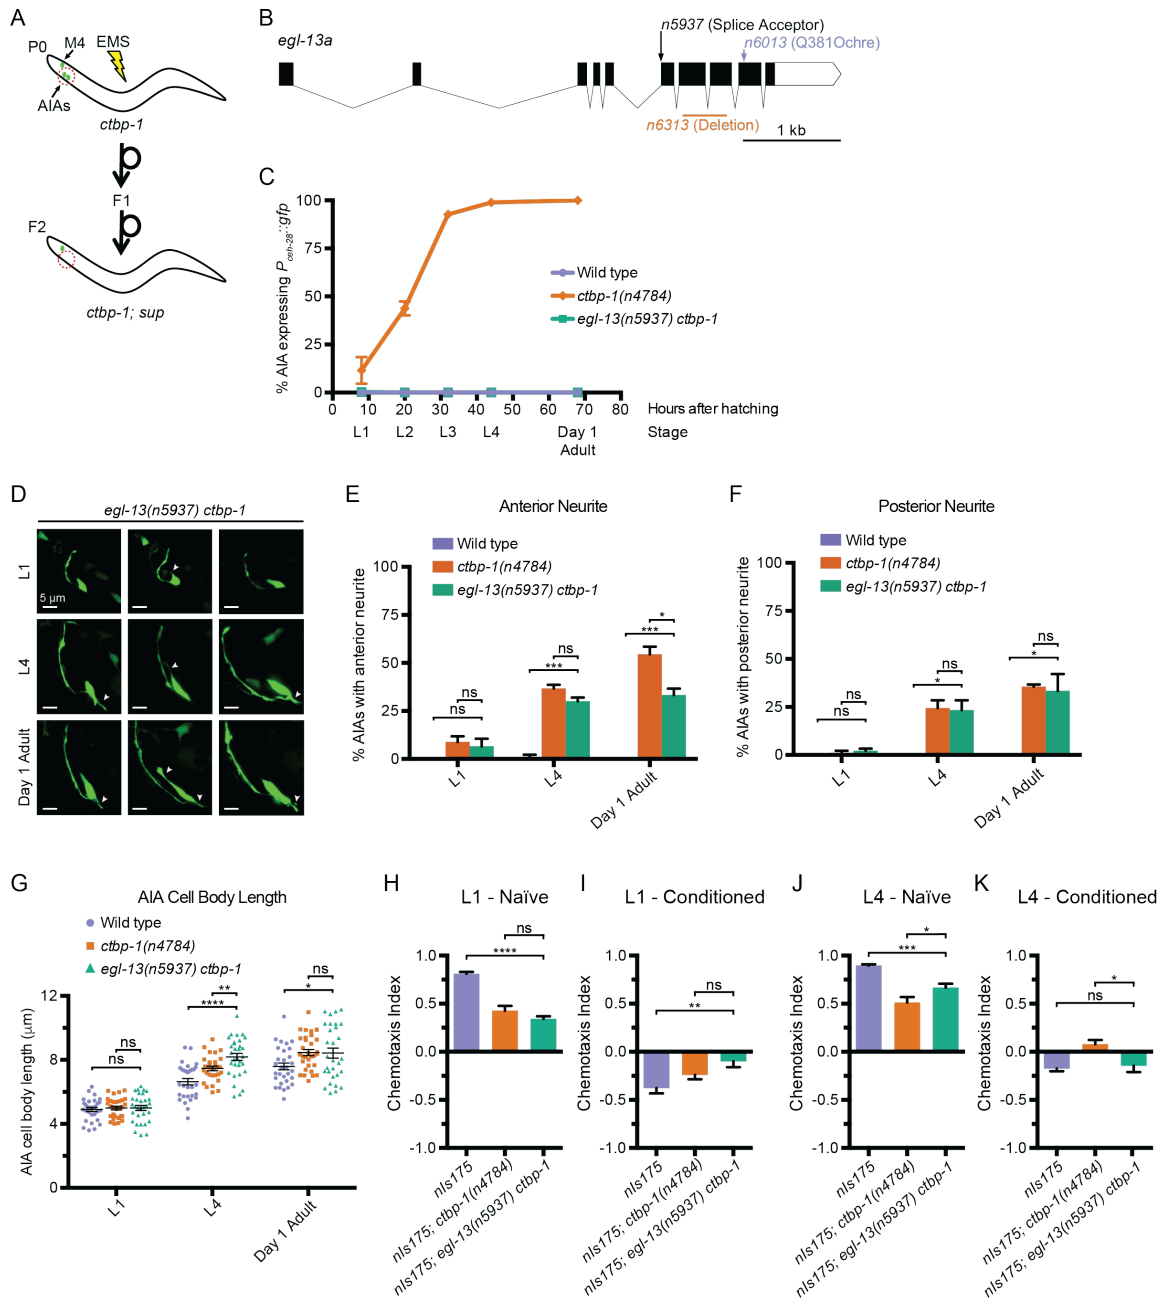

1087

1088 **Figure 6. A suppressor screen reveals *egl-13* as a *ctbp-1* genetic interactor**

1089 (A) Schematic of *ctbp-1* suppressor screen design. *ctbp-1* mutant worms carrying

1090 *nls175*[*P<sub>ceh-28</sub>::gfp*] were mutagenized with ethyl methanesulfonate (EMS), and

1091 their F2 progeny were screened for continued *nls175* expression in M4 and loss  
1092 of expression in the AIA neurons (red circle).

1093 (B) Gene diagram of the *egl-13a* isoform. Arrows (above), point mutations. Line  
1094 (below), deletion. Scale bar (bottom right), 1 kb.

1095 (C) Percentage of wild-type, *ctbp-1* and *egl-13(n5937)* worms expressing *nls175*  
1096 in the AIA neurons over time. Time points correspond to the L1, L2, L3, L4 larval  
1097 stages, and day 1 adult worms (indicated below X axis). All strains contain  
1098 *nls175[P<sub>ceh-28</sub>::gfp]*. Mean  $\pm$  SEM.  $n \geq 100$  worms per strain per stage, 3  
1099 biological replicates.

1100 (D) Three representative images of an AIA neuron in *egl-13 ctbp-1* worms at L1  
1101 (top), L4 (middle) and day 1 adult (bottom) stages. Arrows, examples of ectopic  
1102 neurites protruding from the AIA cell body. Image oriented such that left  
1103 corresponds to anterior, top to dorsal. Scale bar, 5  $\mu$ m.

1104 (E-F) Percentage of AIAs in wild-type, *ctbp-1* and *egl-13 ctbp-1* worms at the L1,  
1105 L4 and day 1 adult stages with an ectopic neurite protruding from the (E) anterior  
1106 or (F) posterior of the AIA cell body. Mean  $\pm$  SEM.  $n = 30$  AIAs scored per strain  
1107 per stage, 3 biological replicates. ns, not significant, \* $p < 0.05$ , \*\*\* $p < 0.001$ ,  
1108 unpaired t-test.

1109 (G) Quantification of AIA cell body length in wild-type, *ctbp-1* and *egl-13 ctbp-1*  
1110 worms at the L1, L4 and day 1 adult stages. Mean  $\pm$  SEM.  $n \geq 30$  AIAs scored  
1111 per strain per stage. ns, not significant, \* $p < 0.05$ , \*\* $p < 0.01$ , \*\*\*\* $p < 0.0001$ ,  
1112 unpaired t-test.

1113 (H-K) Chemotaxis indices of (H,J) naïve or (I,K) conditioned wild-type, *ctbp-1* and  
1114 *egl-13 ctbp-1* worms at the (H-I) L1 or (J-K) L4 larval stage. Mean  $\pm$  SEM.  $n \geq 5$   
1115 assays per condition,  $\geq 50$  worms per assay. ns, not significant, \* $p < 0.05$ ,  
1116 \*\* $p < 0.01$ , \*\*\* $p < 0.001$ , \*\*\*\* $p < 0.0001$ , unpaired t-test.  
1117 The *ctbp-1* allele used for all panels of this figure was *n4784*. The *egl-13* allele  
1118 used for all panels of this figure was *n5937*.  
1119 All strains in (D-G) contain *nls840[P<sub>gcy-28.d</sub>::gfp]* and all strains in (D-G) other than  
1120 “Wild type” contain *nls348[P<sub>ceh-28</sub>::mCherry]* (not shown in images).  
1121 All strains in (C, H-K) contain *nls175[P<sub>ceh-28</sub>::gfp]*.  
1122

Figure 7

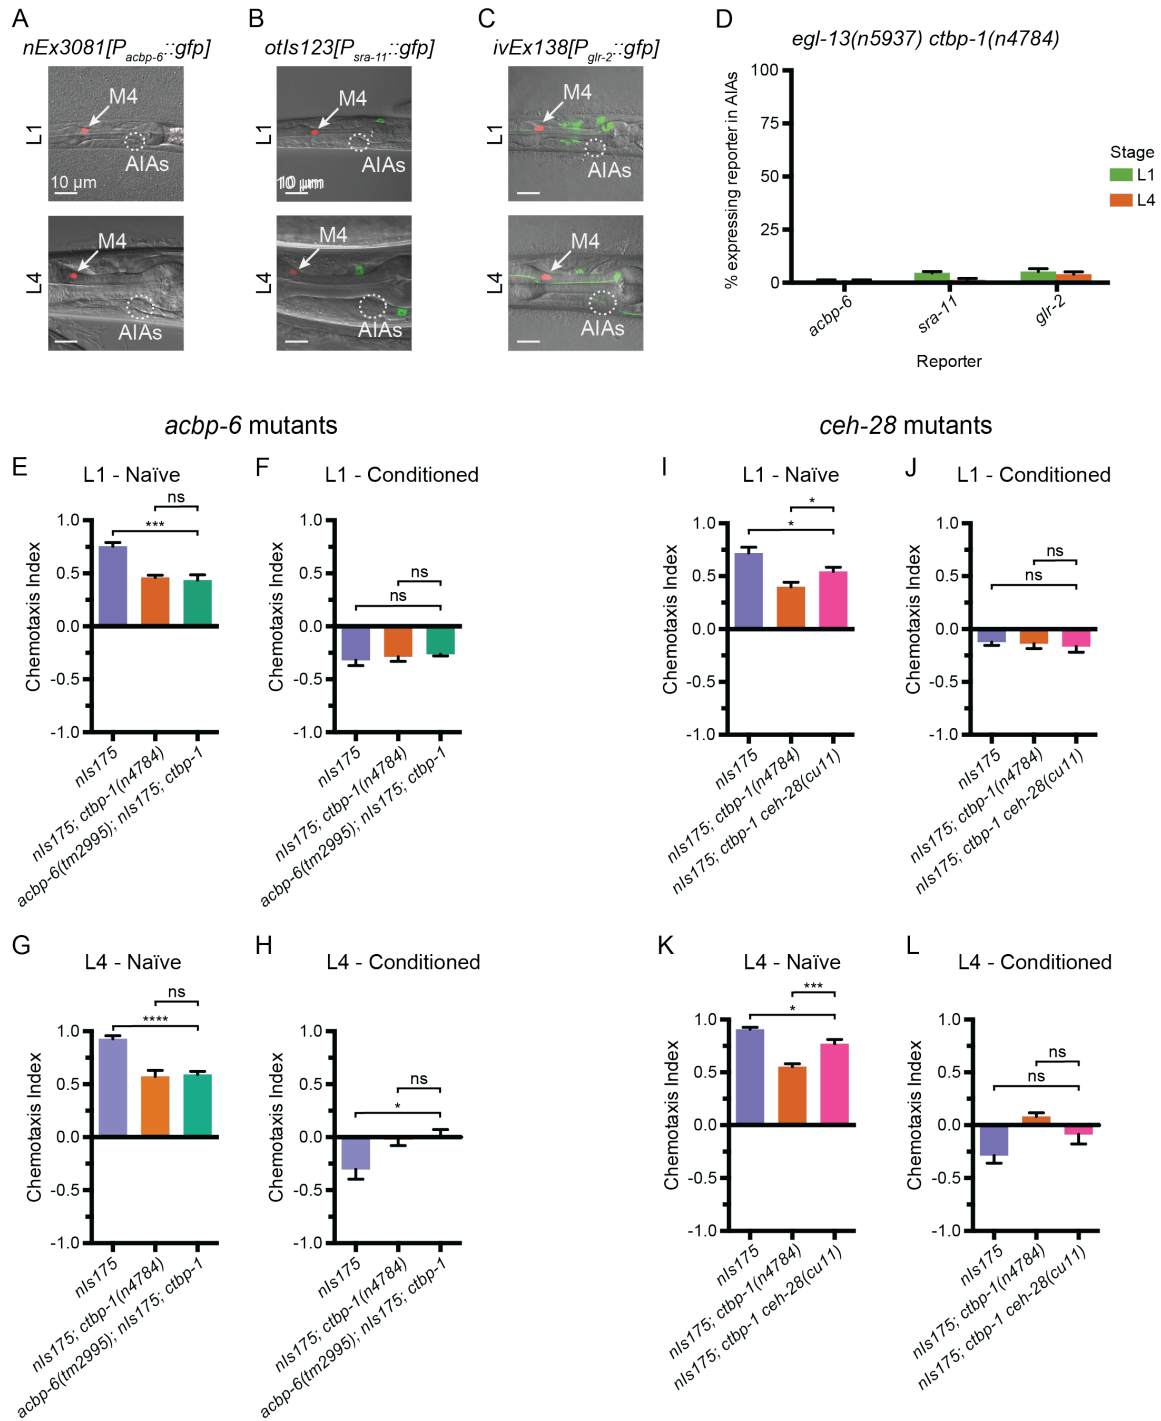

1123

1124

**Figure 7. EGL-13 disrupts AIA function partially through driving**

1125

**misexpression of *ceh-28* in *ctbp-1* mutants**

1126 (A-C) Expression of markers for AIA misexpressed genes (A) *nEx3081[P<sub>acbp-6::gfp</sub>]*, (B) *otIs123[P<sub>sra-11::gfp</sub>]*, or (C) *ivEx138[P<sub>glr-2::gfp</sub>]* in *egl-13(n5937) ctbp-1(n4784)* double mutants at the (top) L1 and (bottom) L4 larval stages. Arrow, M4 neuron. Circle, AIAs. Scale bar, 10  $\mu$ m.

1130 (D) Percentage of *egl-13(n5937) ctbp-1(n4784)* double mutants expressing the indicated reporter in the AIA neurons at the L1 and L4 larval stages. Mean  $\pm$  SEM.  $n \geq 50$  worms scored per strain, 3 biological replicates.

1133 (E-H) Chemotaxis indices of (E,G) naïve or (F,H) conditioned wild-type (*nIs175*), *nIs175; ctbp-1(n4784)*, and *acbp-6(tm2995); nIs175; ctbp-1* mutants at the (E-F) L1 or (G-H) L4 larval stage. Mean  $\pm$  SEM.  $n \geq 6$  assays per condition,  $\geq 50$  worms per assay. ns, not significant, \* $p < 0.05$ , \*\*\* $p < 0.001$ , \*\*\*\* $p < 0.0001$ , unpaired t-test.

1138 (I-L) Chemotaxis indices of (I,K) naïve or (J,L) conditioned wild-type (*nIs175*), *nIs175; ctbp-1(n4784)*, and *nIs175; ctbp-1 ceh-28(cu11)* mutants at the (I-J) L1 or (K-L) L4 larval stage. Mean  $\pm$  SEM.  $n \geq 6$  assays per condition,  $\geq 50$  worms per assay. ns, not significant, \* $p < 0.05$ , \*\*\* $p < 0.001$ , unpaired t-test.

1142 The *ctbp-1* allele used for all panels of this figure was *n4784*.

1143 All strains in Fig. 7A-D contain *nIs348[P<sub>ceh-28::mCherry</sub>]*.

1144 Images are oriented such that left corresponds to anterior, top to dorsal.

1145

Figure 8

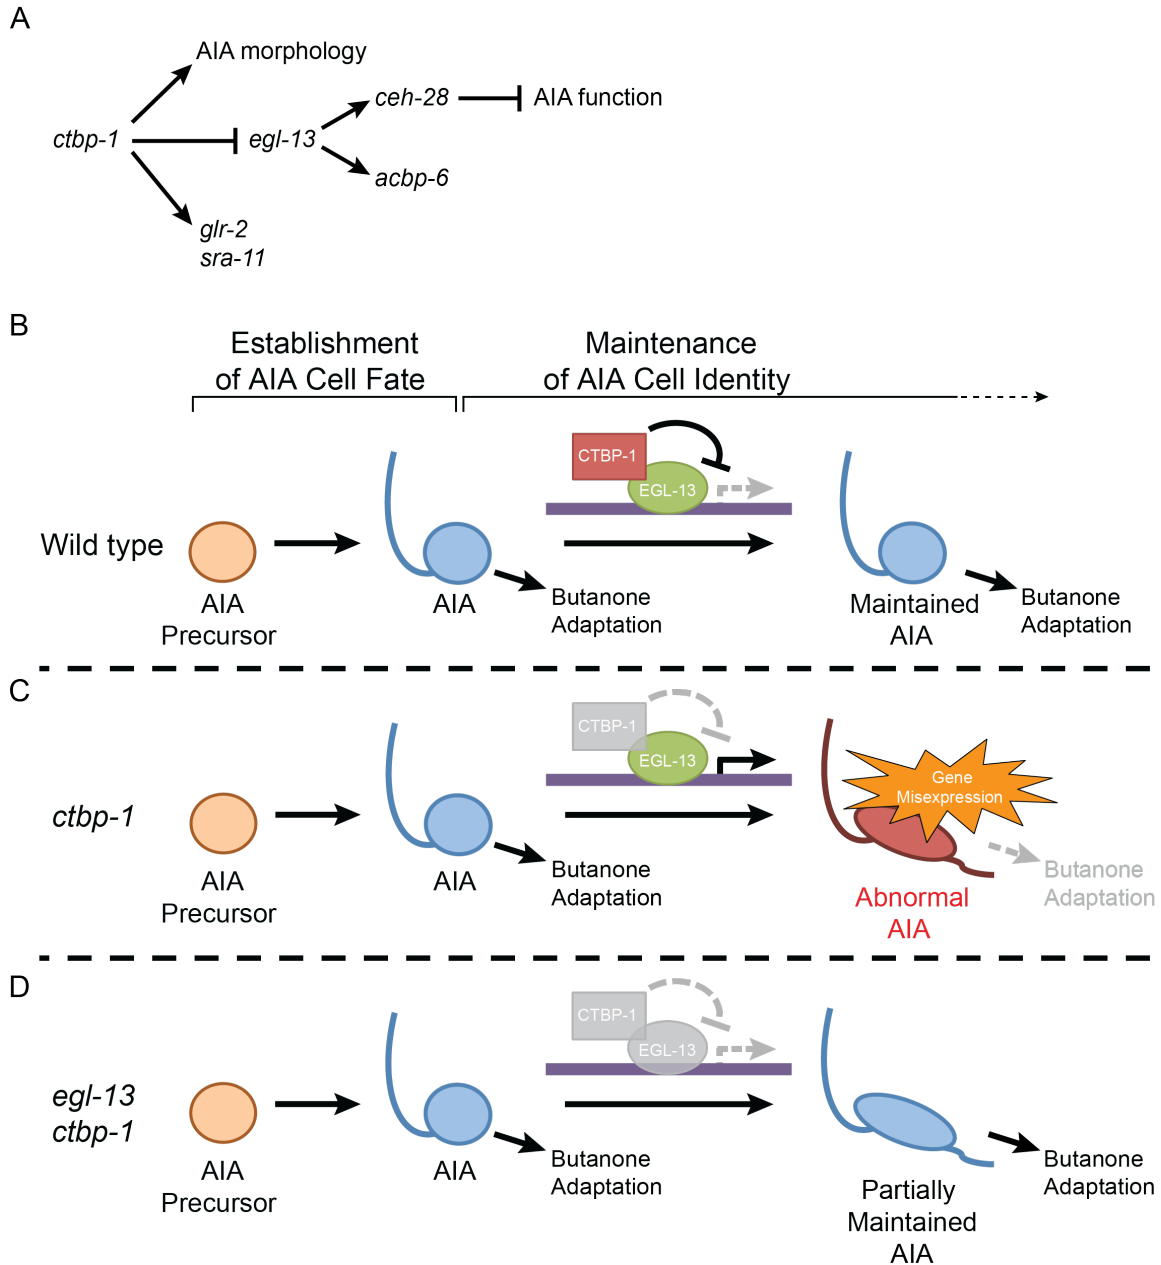

1146

1147 **Figure 8. Model for the maintenance of the AIA cell identity by *ctbp-1***

1148 (A) The genetic pathway in which *ctbp-1* promotes AIA morphology and *glr-2* and

1149 *sra-11* expression. *ctbp-1* also inhibits *egl-13*, thereby repressing expression of

1150 *ceh-28* and *acbp-6* in the AIAs and promoting proper AIA function

1151 (B-D) Model for how CTBP-1 maintains the AIA cell identity.

1152 (B) We propose that CTBP-1 acts in the maintenance but not establishment of  
 1153 the AIA cell identity, and does so by targeting specific genetic loci for regulation  
 1154 through physical interaction with transcription factors such as EGL-13.  
 1155 (C) In the absence of CTBP-1, EGL-13 and other CTBP-1 targets drive  
 1156 expression at multiple genetic loci, resulting in changes to the gene expression,  
 1157 morphology and function (as assessed by butanone adaptation) of the AIAs.  
 1158 (D) When EGL-13 activity is also removed, gene expression and cellular function  
 1159 are no longer perturbed, while normal morphology is not restored, resulting in a  
 1160 “Partially Maintained AIA.”  
 1161

Figure S1

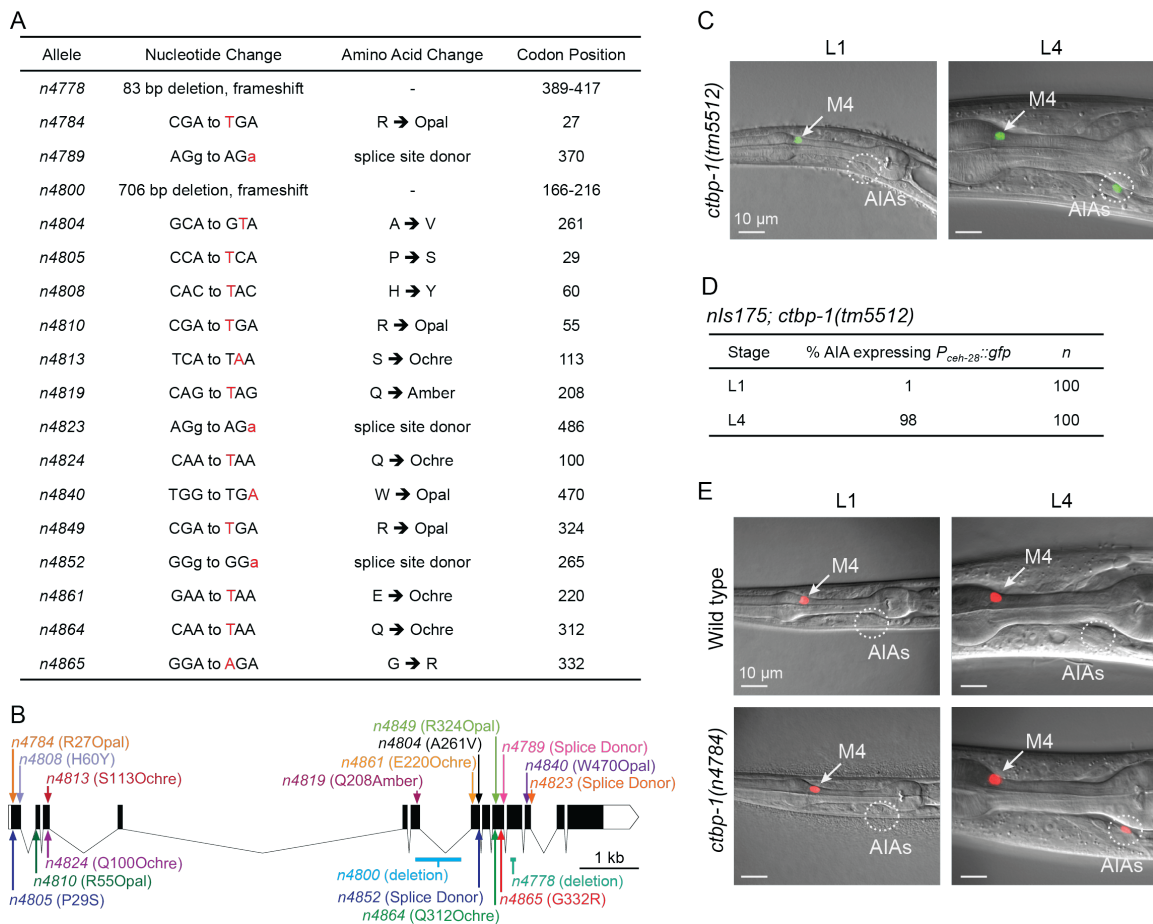

1162

1163 **Figure S1. Additional *ctbp-1* mutant alleles cause misexpression of  $P_{ceh-28}::gfp$  in the AIA neurons**

1164 (A) Table of *ctbp-1* mutant alleles we showed to result in *nls175*[ $P_{ceh-28}::gfp$ ] or *nls177*[ $P_{ceh-28}::gfp$ ] misexpression in the AIA neurons. Specific nucleotide changes are denoted in red. Codon positions correspond to the *ctbp-1a* isoform.

1165 (B) Gene diagram of the *ctbp-1a* isoform showing all 18 *ctbp-1* alleles isolated in this study. Arrows, point mutations. Lines, deletions. Scale bar (bottom right), 1 kb.

1166 (C) Expression of *nls175* in *ctbp-1(tm5512)* L1 and L4 mutant worms. Arrow, M4 neuron. Circle, AIAs. Scale bar, 10  $\mu$ m.

1167 (D) Percentage of *ctbp-1(tm5512)* worms expressing *nls175* in the AIA neurons at the L1 and L4 larval stages.

1168 (E) *nls348*[ $P_{ceh-28}::mCherry$ ] expression in wild-type (top) and *ctbp-1(n4784)* (bottom) worms at the L1 larval stage (left) and L4 larval stage (right). Arrow, M4 neuron. Circle, AIAs. Scale bar, 10  $\mu$ m.

1169 All strains in Fig. S1A-C contain the either *nls175*[ $P_{ceh-28}::gfp$ ] or *nls177*[ $P_{ceh-28}::gfp$ ].

1170 Images are oriented such that left corresponds to anterior, top to dorsal.

1171

1172

1173

1174

1175

1176

1177

1178

1179

1180

1181



Figure S2

A

| Genotype                                                 | % AIA expressing $P_{ceh-28}::gfp$ | <i>n</i> |
|----------------------------------------------------------|------------------------------------|----------|
| Wild type                                                | 0                                  | 100      |
| <i>ctbp-1(n4784)</i>                                     | 98                                 | 100      |
| <i>ctbp-1(n4808)</i>                                     | 98                                 | 100      |
| <i>ctbp-1(n4784); nEx2346[ctbp-1(+)]</i>                 | 12                                 | 100      |
| <i>ctbp-1(n4784); nEx2347[ctbp-1(+)]</i>                 | 4                                  | 100      |
| <i>ctbp-1(n4784); nIs743[P<sub>AIA</sub>::ctbp-1(+)]</i> | 0                                  | 100      |

B

*ctbp-1(n4784); nEx2351[P<sub>hsp</sub>::ctbp-1(+)]*

| Stage              | % AIA expressing $P_{ceh-28}::gfp$ | <i>n</i> |
|--------------------|------------------------------------|----------|
| L1                 | 8                                  | 100      |
| L4                 | 99                                 | 100      |
| Day 1 Adult (- HS) | 100                                | 100      |
| Day 1 Adult (+ HS) | 8                                  | 100      |

1182

1183 **Figure S2. Quantification of *ctbp-1* strains misexpressing  $P_{ceh-28}::gfp$**

1184 (A) Percentage of worms of indicated genotypes expressing  $nIs175[P_{ceh-28}::gfp]$

1185 in the AIA neurons at the L4 larval stage.

1186 (B) Percentage of *ctbp-1(n4784); nEx2351[P<sub>hsp-16.2</sub>::ctbp-1(+); P<sub>hsp-16.41</sub>::ctbp-1(+)]*

1187 worms expressing  $nIs175$  at the L1, L4 and day 1 adult stages. Day 1 adults

1188 shown  $\pm$  heat shock (HS) at the L4 stage.

1189

Figure S3

A

M4 markers

| Reporter      | Wild type          |                      |          | <i>ctbp-1(n4784)</i> |                      |          |
|---------------|--------------------|----------------------|----------|----------------------|----------------------|----------|
|               | % expressing in M4 | % expressing in AIAs | <i>n</i> | % expressing in M4   | % expressing in AIAs | <i>n</i> |
| <i>ayls4</i>  | 100                | 0                    | 50       | 100                  | 0                    | 50       |
| <i>ctls43</i> | 100                | 0                    | 50       | 100                  | 0                    | 50       |
| <i>nls491</i> | 100                | 0                    | 50       | 100                  | 0                    | 50       |
| <i>ynls80</i> | 100                | 0                    | 50       | 100                  | 0                    | 50       |

B

AIA markers

| Reporter        | Wild type          |                      |          | <i>ctbp-1(n4784)</i> |                      |          |
|-----------------|--------------------|----------------------|----------|----------------------|----------------------|----------|
|                 | % expressing in M4 | % expressing in AIAs | <i>n</i> | % expressing in M4   | % expressing in AIAs | <i>n</i> |
| <i>nls843</i>   | 0                  | 100                  | 50       | 0                    | 100                  | 50       |
| <i>otls326</i>  | 0                  | 100                  | 50       | 0                    | 100                  | 50       |
| <i>pels1716</i> | 0                  | 100                  | 50       | 0                    | 100                  | 50       |
| <i>otls379</i>  | 0                  | 100                  | 50       | 0                    | 100                  | 50       |
| <i>otls317</i>  | 0                  | 100                  | 50       | 0                    | 100                  | 50       |

1190

1191 **Figure S3. Quantification of M4 and AIA marker expression**

1192 (A-B) Quantification of wild-type and *ctbp-1(n4784)* L4 worms expressing the

1193 indicated (A) M4 or (B) AIA markers from Fig. 2A-B in the M4 and AIA neurons.

1194

Figure S4

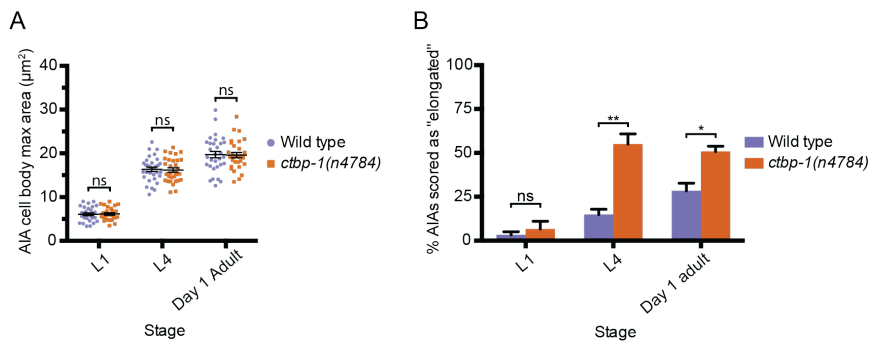

1195

1196 **Figure S4. Loss of *ctbp-1* results in a disruption of AIA morphology but not**

1197 **AIA size**

1198 (A) Quantification of maximum AIA cell body area in wild-type and *ctbp-1(n4784)*

1199 worms at L1, L4 and day 1 adult stages. Both strains contain *nls840[P<sub>gcy-28.d::gfp</sub>]*

1200 and the *ctbp-1* strain contains *nls348[P<sub>ceh-28</sub>::mCherry]*. Mean  $\pm$  SEM.  $n \geq 30$   
1201 AIAs scored per strain per stage. ns, not significant, unpaired t-test.  
1202 (B) Scoring of wild-type and *ctbp-1(n4784)* AIA images at the L1, L4 and day 1  
1203 adult stages. A random subset of AIA images used for length measurements in  
1204 Fig. 3D, 3H and 3L were blinded and scored as having either “Normal” or  
1205 “Elongated” AIA cell bodies.  $n \geq 20$  AIAs scored per strain per stage, 3 replicates.  
1206 ns, not significant, \* $p < 0.05$ , \*\* $p < 0.01$ , unpaired t-test.  
1207

Figure S5

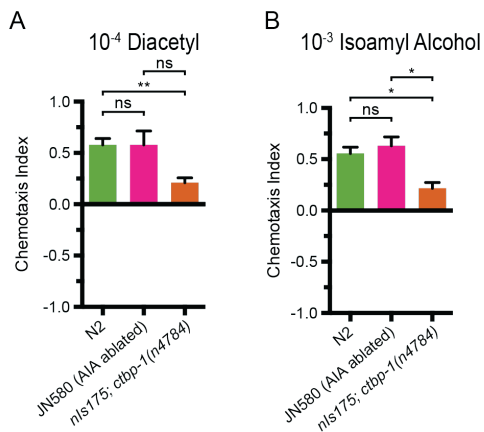

1208 **Figure S5. *ctbp-1* mutants display non-AIA-dependent chemotaxis defects**  
1209 (A-B) Chemotaxis indices of wild-type (N2), AIA-ablated (JN580) and *nls175*;  
1210 *ctbp-1(n4784)* mutants at the L4 larval stage to (A) diacetyl or (B) isoamyl alcohol  
1211 diluted in pure ethanol. Mean  $\pm$  SEM.  $n \geq 3$  assays per condition,  $\geq 40$  worms per  
1212 assay. ns, not significant, \* $p < 0.05$ , \*\* $p < 0.01$ , unpaired t-test.  
1213  
1214

Figure S6

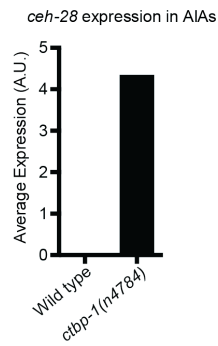

1215

1216 **Figure S6. *ceh-28* expression in AIA**

1217 Average expression level of *ceh-28* in the AIAs of L4 wild-type and *ctbp-1* mutant

1218 animals. A.U., arbitrary expression units.

1219

Figure S7

A

| Allele       | Nucleotide Change | Amino Acid Change    | Codon Position |
|--------------|-------------------|----------------------|----------------|
| <i>n5937</i> | gAT to aAT        | splice site acceptor | 158            |
| <i>n6013</i> | CAA to TAA        | Q → Ochre            | 381            |
| <i>n6313</i> | 436 bp deletion   | -                    | 205-334        |

B

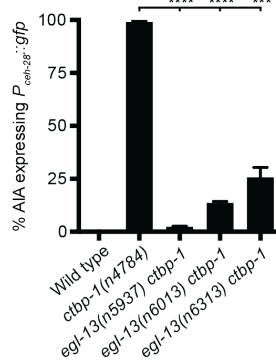

1220

C

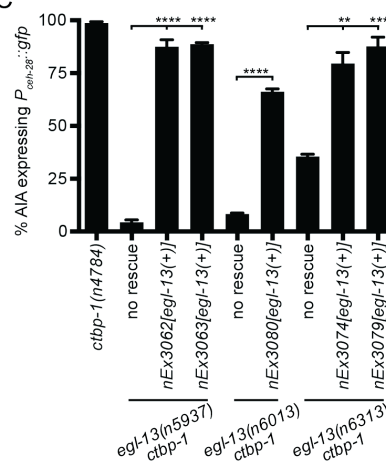

1221 **Figure S7. Characterization of *egl-13* alleles isolated as *ctbp-1* suppressors**

1222 (A) Table of *egl-13* mutant alleles isolated in this study as suppressors of *ctbp-1*-

1223 mediated  $nls175[P_{ceh-28}::gfp]$  misexpression in the AIA neurons. Specific

1224 nucleotide changes are denoted in red. Codon positions correspond to *egl-13a*  
1225 isoform.  
1226 (B) Percentage of wild-type, *ctbp-1(n4784)* and *egl-13 ctbp-1* worms expressing  
1227 *nls175* in the AIA neurons at the L4 larval stage. Mean  $\pm$  SEM.  $n \geq 100$  worms  
1228 scored per strain, 3 biological replicates. \*\*\* $p < 0.001$ , \*\*\*\* $p < 0.0001$ , unpaired t-  
1229 test.  
1230 (C) Percentage of *ctbp-1(n4784)*, *egl-13 ctbp-1* and *egl-13 ctbp-1* worms carrying  
1231 transgenic constructs expressing wild-type *egl-13* under its native promoter  
1232 expressing *nls175* in the AIA neurons at the L4 larval stage. Mean  $\pm$  SEM.  $n \geq 50$   
1233 worms scored per strain, 3 biological replicates. \*\* $p < 0.01$ , \*\*\* $p < 0.001$ ,  
1234 \*\*\*\* $p < 0.0001$ , unpaired t-test.  
1235 All strains in Fig. S7B-C contain *nls175[P<sub>ceh-28</sub>::gfp]*.  
1236

Figure S8

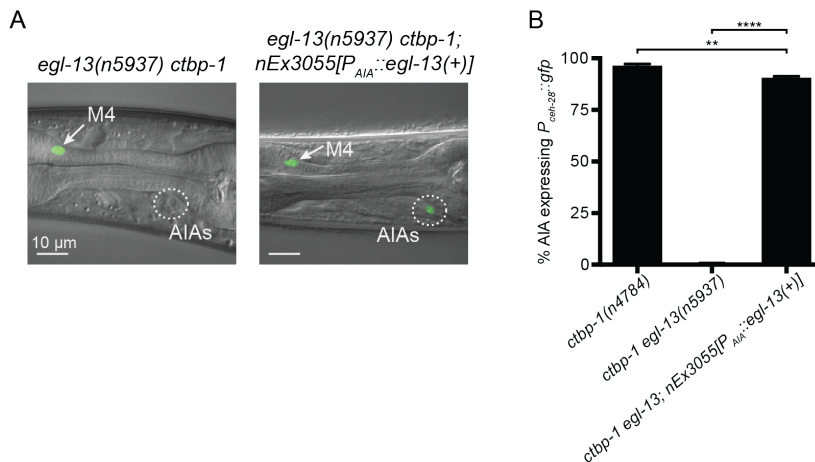

1237

1238 **Figure S8. EGL-13 functions cell-autonomously to regulate AIA gene**

1239 **expression**

1240 (A) Expression of *nls175*[*P<sub>ceh-28</sub>::gfp*] in *egl-13(n5937) ctbp-1(n4784)* (left panel),  
1241 and *egl-13 ctbp-1* mutants carrying an extrachromosomal array expressing wild-  
1242 type *egl-13* under the AIA-specific promoter *gcy-28.d* (*nEx3055*, right panel) in L4  
1243 worms. Arrow, M4 neuron. Circle, AIAs. Scale bar, 10  $\mu$ m.

1244 (B) Percentage of *ctbp-1(n4784)*, *egl-13(n5937) ctbp-1* and *egl-13 ctbp-1*;  
1245 *nEx3055* worms expressing *nls175* in the AIA neurons at the L4 larval stage. All  
1246 strains contain *nls175*[*P<sub>ceh-28</sub>::gfp*]. Mean  $\pm$  SEM. *n* = 100 worms scored per  
1247 strain, 3 biological replicates. \*\**p*<0.01, \*\*\*\**p*<0.0001, unpaired t-test.

1248 The alleles used for all panels of this figure were *ctbp-1(n4784)* and *egl-*  
1249 *13(n5937)*.

1250 All strains contain *nls175*[*P<sub>ceh-28</sub>::gfp*].

1251 Images are oriented such that left corresponds to anterior, top to dorsal.
